# Supplementary material for: Benzo[1,2-b:4,5-b′]diselenophene-fused nonfullerene acceptors with alternative aromatic ring-based and monochlorinated end groups: a new synergistic strategy to simultaneously achieve highly efficient organic solar cells with the energy loss of 0.49 eV
Source: Royal Society of Chemistry journal article supplement (doi:10.1039/c9ta03177d), 2019-01-01
Supplement: c9ta03177d1.pdf [file c9ta03177d1.pdf]

## Supporting Information

### **Benzo[1,2-*b*:4,5-*b'*]diselenophene-fused nonfullerene acceptors with alternative aromatic ring-based and monochlorinated end group: new synergistic strategy to simultaneously achieve highly efficient organic solar cells with energy loss of 0.49 eV**

Shi-Sheng Wan,<sup>a, #</sup> Xiaopeng Xu,<sup>b, #</sup> Jin-Liang Wang,<sup>a, #, \*</sup> Gui-Zhou Yuan,<sup>a</sup> Zhao Jiang,<sup>a</sup> Gao-Yang Ge,<sup>a</sup> Hai-Rui Bai,<sup>a</sup> Zheng Li,<sup>a</sup> Qiang Peng<sup>b, \*</sup>

<sup>a</sup>Key Laboratory of Cluster Science of Ministry of Education, Beijing Key Laboratory of Photoelectronic/Electrophotonic Conversion Materials, School of Chemistry and Chemical Engineering, Beijing Institute of Technology, 5 South Zhongguancun Street, Beijing, 100081, China.

E-mail: [jinliwang@bit.edu.cn](mailto:jinliwang@bit.edu.cn)

<sup>b</sup>Key Laboratory of Green Chemistry and Technology of Ministry of Education, College of Chemistry, Sichuan University, Chengdu 610064, P. R. China

E-mail: [qiangpengjohnny@yahoo.com](mailto:qiangpengjohnny@yahoo.com)

#Shi-Sheng Wan, Xiaopeng Xu, and Jin-Liang Wang contributed equally.

### **Experimental Section**

**Materials and Characterization:** All air and water-sensitive reactions were carried out under N<sub>2</sub>. Toluene and THF were dried by Na and then freshly distilled before to use. The other precursors were used as the common commercial level. <sup>1</sup>H and <sup>13</sup>C NMR spectra were carried out on a Bruker Ascend-400 and 700 NMR spectrometer. All chemical shifts were reported in ppm. Chemical shifts in <sup>1</sup>H NMR were referenced to TMS and in <sup>13</sup>C NMR were referenced to CDCl<sub>3</sub>. MALDI-TOF-MS was recorded on a Bruker BIFLEX III mass spectrometer. Thermogravimetric analysis (TGA) was performed using a TA Instrument Q600 analyzer under nitrogen gas flow with a heating rate of 10 °C min<sup>-1</sup>. Elemental analyses were performed using a German Vario EL III elemental analyzer. UV-vis absorption spectra were taken on an Hitachi UH5300 UV-vis spectrometer. The electrochemical cyclic voltammetry was carried out on CHI electrochemical workstation with glass carbon disk, Ag/Ag<sup>+</sup> electrode, and Pt wire, as working electrode, reference electrode, and counter electrode, respectively, in a 0.1 M tetrabutylammonium hexafluorophosphate (Bu<sub>4</sub>NPF<sub>6</sub>) acetonitrile solution. During CV measurements, the films were drop-cast on the glass carbon working electrode from THF solution. Atomic force microscopy (AFM) measurements were taken on a Bruker Inova atomic microscope in tapping mode. Transmission electron microscope (TEM) measurements were performed using a ZEISS LIBRA 200 FE instrument at 200 kV accelerating voltage. Grazing incidence X-ray scattering (GIXD) data were performed at beamline BL14B1 of the Shanghai Synchrotron Radiation Facility (SSRF).

**BHJ-OSC Fabrication and Characterization:** The device structure was Glass/ITO/ZnO/active layer/MoO<sub>3</sub>/Ag. The hole-only devices structure was Glass/ITO/PEDOT:PSS/active layer/MoO<sub>3</sub>/Au and the electron-only device structure was Glass/Al/active layer/Al. A glass substrate with a pre-patterned ITO (sheet resistance = 15 Ω sq<sup>-1</sup>) was ultrasonicated subsequently in detergent, deionized water, acetone, and isopropanol. After the plates were dried by high-pressure air flow, the substrates were cleaned by UV-ozone treatment for 30 min. ZnO precursor (2M diethylzinc solution in toluene, diluted with THF) was spin-coated on the substrates at 5000 rpm for 30 s in dry air, which were then baked on a

hot plate at 180 °C for about 30 min. After cooled to room temperature, the substrates were sent to an argon filled glove box. A blend film of PM7: NF-SMAs (**BDS<sub>e</sub>ThCl** or **BDS<sub>e</sub>PhCl**) (1:1, w/w) was prepared by spin-coating its hot solution (80 °C) of chlorobenzene/1,8-diiodoctane (99.5:0.5, total concentration: 18 mg mL<sup>-1</sup>) at 3000 rpm for 30 s. The substrates were then thermal annealed at 100 °C for 10 min. A thin layer (10 nm) of MoO<sub>3</sub> and Ag cathode (100 nm) were deposited by thermal evaporation in a high vacuum chamber (~10<sup>-6</sup> mbar). The optimal thickness of the active layer was typical 100 nm, which was measured using a Dektak 6 M surface profilometer. The device area was exactly fixed at 4.0 mm<sup>2</sup>. The *J-V* characterization of the devices was carried out on a computer-controlled Keithley 2400 Source Measurement system with a solar simulator (XES-70S1, SAN EI Co., Ltd.) was used as the light source. The light intensity was monitored by using a standard Si solar cell (KONICA MINOLTA, INC.). The EQE values were tested with a Newport Model 77890 (Newport Co., Ltd.) during illumination with monochromatic light from a xenon lamp.

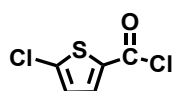

**5-chlorothiophene-2-carbonyl chloride (compound 2):** In a 100 mL round-bottom flask, 5-chlorothiophene-2-carboxylic acid (3.0 g, 16.6 mmol) was evacuated and backfilled with N<sub>2</sub> three times, and freshly distilled toluene (50 mL) and 0.5 mL of dry DMF was added. Then, thionyl chloride (13.4 mL, 166 mmol) was added to the solution. The reaction mixture was stirred at 85 °C for 3 h. The excess thionyl chloride was removed by under reduced pressure, and the compound 2 was used for next step without further purification.

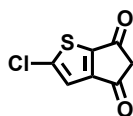

**2-chloro-4H-cyclopenta[b]thiophene-4,6(5H)-dione (compound 3):** In a 100 mL two-neck round-bottom flask, AlCl<sub>3</sub> (14.7 g, 110 mmol), malonyl dichloride (12.1 mL, 74.5 mmol) was added. The reaction mixture was evacuated and backfilled with N<sub>2</sub> three times, and then freshly distilled dichloromethane (50 mL) was added into the reaction mixture at 0 °C. A solution of compound 2 (3 g, 16.5 mmol) in dichloromethane (40 mL) was added into the reaction mixture and the reaction mixture was refluxed for 8 h. After being cooled to room temperature, the mixture was poured into oxalic acid aqueous solution slowly. Afterwards, the pH of the solution was tuned close to 7 by using NaHCO<sub>3</sub> aqueous solution. The crude product was purified by silica gel column chromatography, eluting with dichloromethane to obtain the product as yellow solid (1.24 g, 41%). <sup>1</sup>H NMR (CDCl<sub>3</sub>, 400 MHz, ppm): δ 7.26 (s, 1H, Th-H), 3.35 (s, 2H, CH<sub>2</sub>). <sup>13</sup>C NMR (CDCl<sub>3</sub>, 100 MHz, ppm): 189.2, 187.5, 156.5, 152.9, 147.4, 120.1, 47.3.

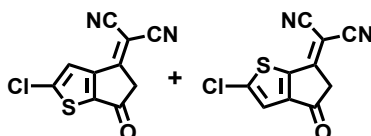

**ThCl:** In a 100 mL round-bottom flask, sodium acetate (0.72 g, 8.7 mmol) was added to a solution of malononitrile (0.72 g, 11.0 mmol) and compound 3 (1.24 g, 6.6 mmol) in anhydrous EtOH (40 mL). The reaction mixture was stirred at room temperature for 2 h. Then 10 mL of water was added into the reaction mixture and acidified by HCl (pH 1-2) and the precipitate was filtered and washed with water and petroleum ether. The crude product was purified by

flash column chromatography (silica gel), eluting with petroleum ether/dichloromethane (1:1) to afford the product as brown yellow solid (1.55 g, 77%).  $^1\text{H}$  NMR ( $\text{CDCl}_3$ , 400 MHz, ppm):  $\delta$  7.79 (s, 2H, Th-H), 7.32 (s, 1H, Th-H), 3.82 (s, 6H,  $\text{CH}_2$ ).  $^{13}\text{C}$  NMR ( $\text{CDCl}_3$ , 100 MHz, ppm): 186.7, 184.9, 160.8, 160.5, 153.9, 152.6, 152.2, 148.7, 148.1, 121.7, 120.7, 120.6, 112.1, 111.6, 111.2, 111.1, 44.8, 44.7, 44.6. HR-ESI-MS ( $m/z$ ): calcd for  $\text{C}_{10}\text{H}_3\text{ClN}_2\text{OS}$ : 233.9655 (100%). Found: 233.9652

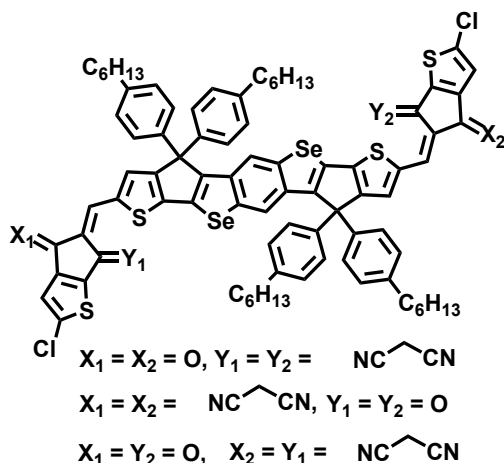

**BDSeThCl:** In a 100 mL two-neck round-bottom flask, compound **BDSeT-CHO**<sup>[1]</sup> (0.26 g, 0.22 mmol), **ThCl** (0.37 g, 1.21 mmol) was added. The reaction mixture was evacuated and backfilled with  $\text{N}_2$  three times, and then freshly degassed chloroform (50 mL) and pyridine (0.8 mL) were added into the reaction mixture. The reaction mixture was stirred at 85 °C for 12 h. Then the solution was poured into methanol and the precipitate was filtered off and washed with methanol. The crude product was purified by silica gel column chromatography, eluting with petroleum ether/dichloromethane (1:1) to give the product as purple solid (0.26 g, 74%).  $^1\text{H}$  NMR ( $\text{CDCl}_3$ , 400 MHz, ppm):  $\delta$  8.58 (s, 1.26H, CH), 8.56 (s, 0.72H, Th-H), 8.09 (s, 0.56H, Th-H), 7.99 (s, 2H, Th-H), 7.84 (s, 1.36H, Th-H), 7.60 (s, 2H, Ph-H), 7.13-7.15 (d,  $J = 8.0$  Hz, 8H, Ph-H), 7.08-7.10 (d,  $J = 8.0$  Hz, 8H, Ph-H), 2.55 (t,  $J = 8.0$  Hz, 8H,  $\text{CH}_2$ ), 1.54-1.60 (m, 8H,  $\text{CH}_2$ ), 1.26-1.34 (m, 24H,  $\text{CH}_2$ ), 0.84-0.88 (m, 12H,  $\text{CH}_3$ ).  $^{13}\text{C}$  NMR ( $\text{CDCl}_3$ , 175 MHz, ppm):  $\delta$  181.9, 180.3, 162.2, 158.3, 158.2, 157.1, 157.0, 156.8, 155.9, 150.2, 149.1, 148.2, 145.2, 145.1, 144.9, 144.2, 142.5, 139.3, 139.1, 138.1, 137.2, 136.9, 136.4, 136.3, 133.2, 128.8, 128.1, 122.8, 122.7, 122.0, 121.6, 120.5, 114.4, 114.0, 113.6, 113.4, 69.3, 67.0, 63.7, 35.5, 31.7, 31.2, 29.1, 22.6, 14.1. MALDI-TOF MS ( $m/z$ ): calcd for  $\text{C}_{90}\text{H}_{76}\text{Cl}_2\text{N}_4\text{O}_2\text{S}_4\text{Se}_2$ : 1602.2 (100%) Found: 1602.4. Elemental Analysis: calcd for  $\text{C}_{90}\text{H}_{76}\text{Cl}_2\text{N}_4\text{O}_2\text{S}_4\text{Se}_2$ : C, 67.45; H, 4.78; N, 3.50. Found: C, 67.24; H, 4.74; N, 3.48.

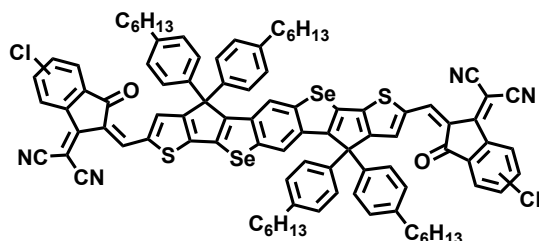

**BDSePhCl:** In a 100 mL two-neck round-bottom flask, compound **BDSeT-CHO** (0.11 g, 0.10 mmol), **PhCl**<sup>[2]</sup> (0.12 g, 0.60 mmol) was added. The reaction mixture was evacuated and backfilled with  $\text{N}_2$  three times, and then freshly degassed chloroform (40 mL) and pyridine (0.8 mL) were added into the reaction mixture. The reaction mixture was stirred at room temperature for 12 h. Then the solution was poured into methanol and the precipitate was filtered off and washed with methanol. The crude product was purified by silica gel column chromatography,

eluting with petroleum ether/dichloromethane (1:1) to give the product as purple solid (0.13 g, 93%).  $^1\text{H}$  NMR ( $\text{CDCl}_3$ , 400 MHz, ppm):  $\delta$  8.86 (s, 2H, CH), 8.64 (s, 1.2H, Ph-H), 8.59-8.61 (d,  $J = 8.0$  Hz, 0.8H, Ph-H), 8.02 (s, 2H, Th-H), 7.81-7.83 (d,  $J = 8.0$  Hz, 2H, Ph-H), 7.67-7.69 (d, s,  $J = 8.0$  Hz, 4H, Ph-H), 7.14-7.16 (d,  $J = 8.0$  Hz, 8H, Ph-H), 7.09-7.11 (d,  $J = 8.0$  Hz, 8H, Ph-H), 2.56 (t,  $J = 8.0$  Hz, 8H,  $\text{CH}_2$ ), 1.54-1.60 (m, 8H,  $\text{CH}_2$ ), 1.26-1.34 (m, 24H,  $\text{CH}_2$ ), 0.84-0.88 (m, 12H,  $\text{CH}_3$ ).  $^{13}\text{C}$  NMR ( $\text{CDCl}_3$ , 175 MHz, ppm):  $\delta$  187.2, 187.0, 162.7, 159.4, 159.3, 159.2, 159.1, 158.7, 144.6, 144.5, 142.6, 141.6, 141.1, 140.6, 138.6, 138.5, 138.2, 138.1, 137.9, 136.7, 134.9, 134.7, 134.3, 133.3, 128.9, 128.1, 126.3, 125.3, 124.5, 123.7, 120.9, 120.8, 114.6, 114.5, 114.4, 114.3, 69.2, 68.6, 63.7, 63.6, 35.5, 31.6, 31.2, 29.1, 22.5, 14.1. MALDI-TOF MS (m/z): calcd for  $\text{C}_{94}\text{H}_{80}\text{Cl}_2\text{N}_4\text{O}_2\text{S}_2\text{Se}_2$ : 1591.3 (100%). Found: 1591.1. Elemental Analysis: calcd for  $\text{C}_{94}\text{H}_{80}\text{Cl}_2\text{N}_4\text{O}_2\text{S}_2\text{Se}_2$ : C, 70.98; H, 5.07; N, 3.52. Found: C, 70.44; H, 5.14; N, 3.42.

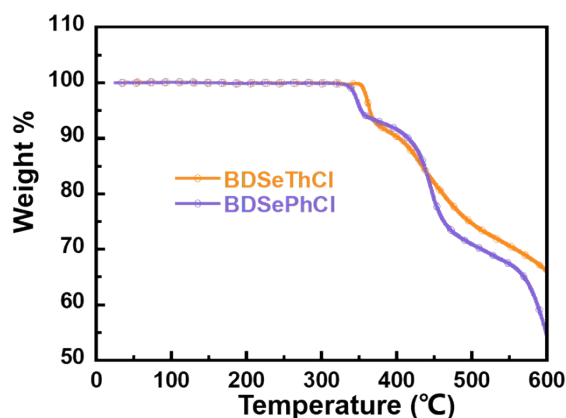

**Figure S1.** Thermal gravity analyse (TGA) of **BDSeThCl** and **BDSePhCl** with a heating rate of 10 °C/min under  $\text{N}_2$  atmosphere.

(a)

**BDS<sub>2</sub>ThCl<sup>1</sup>**

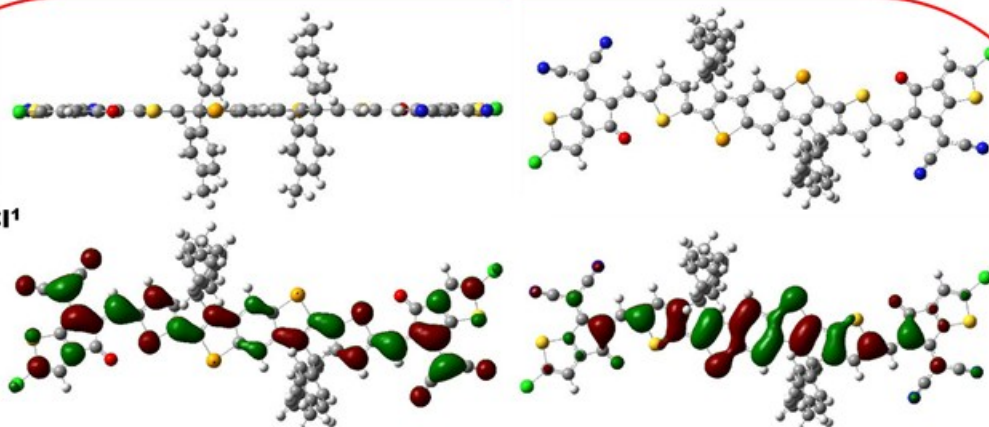

**LUMO = -3.59 eV**

**HOMO = -5.64 eV**

**BDS<sub>2</sub>ThCl<sup>2</sup>**

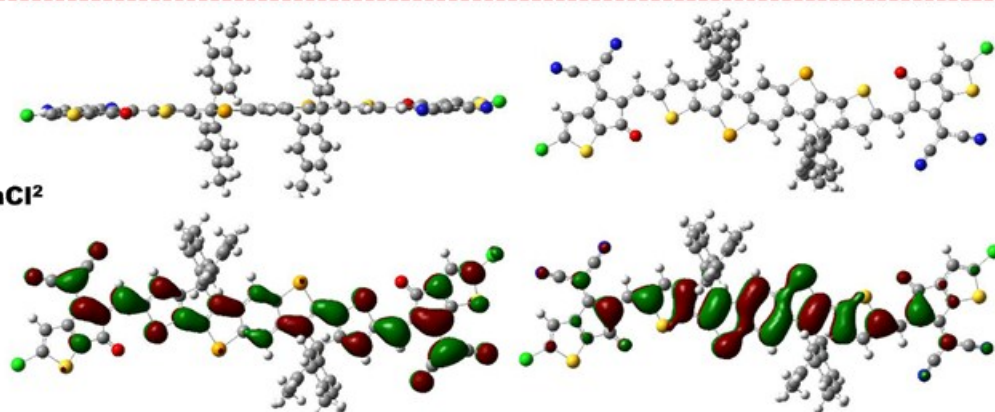

**LUMO = -3.57 eV**

**HOMO = -5.64 eV**

**BDS<sub>2</sub>ThCl<sup>3</sup>**

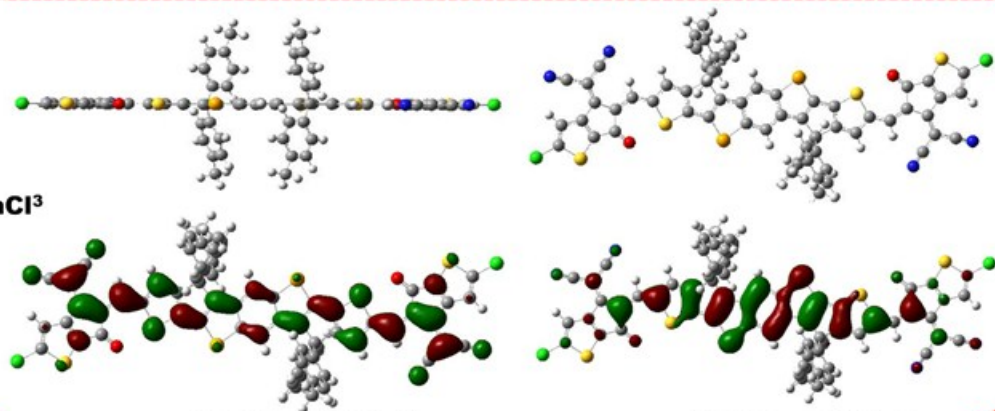

**LUMO = -3.55 eV**

**HOMO = -5.64 eV**

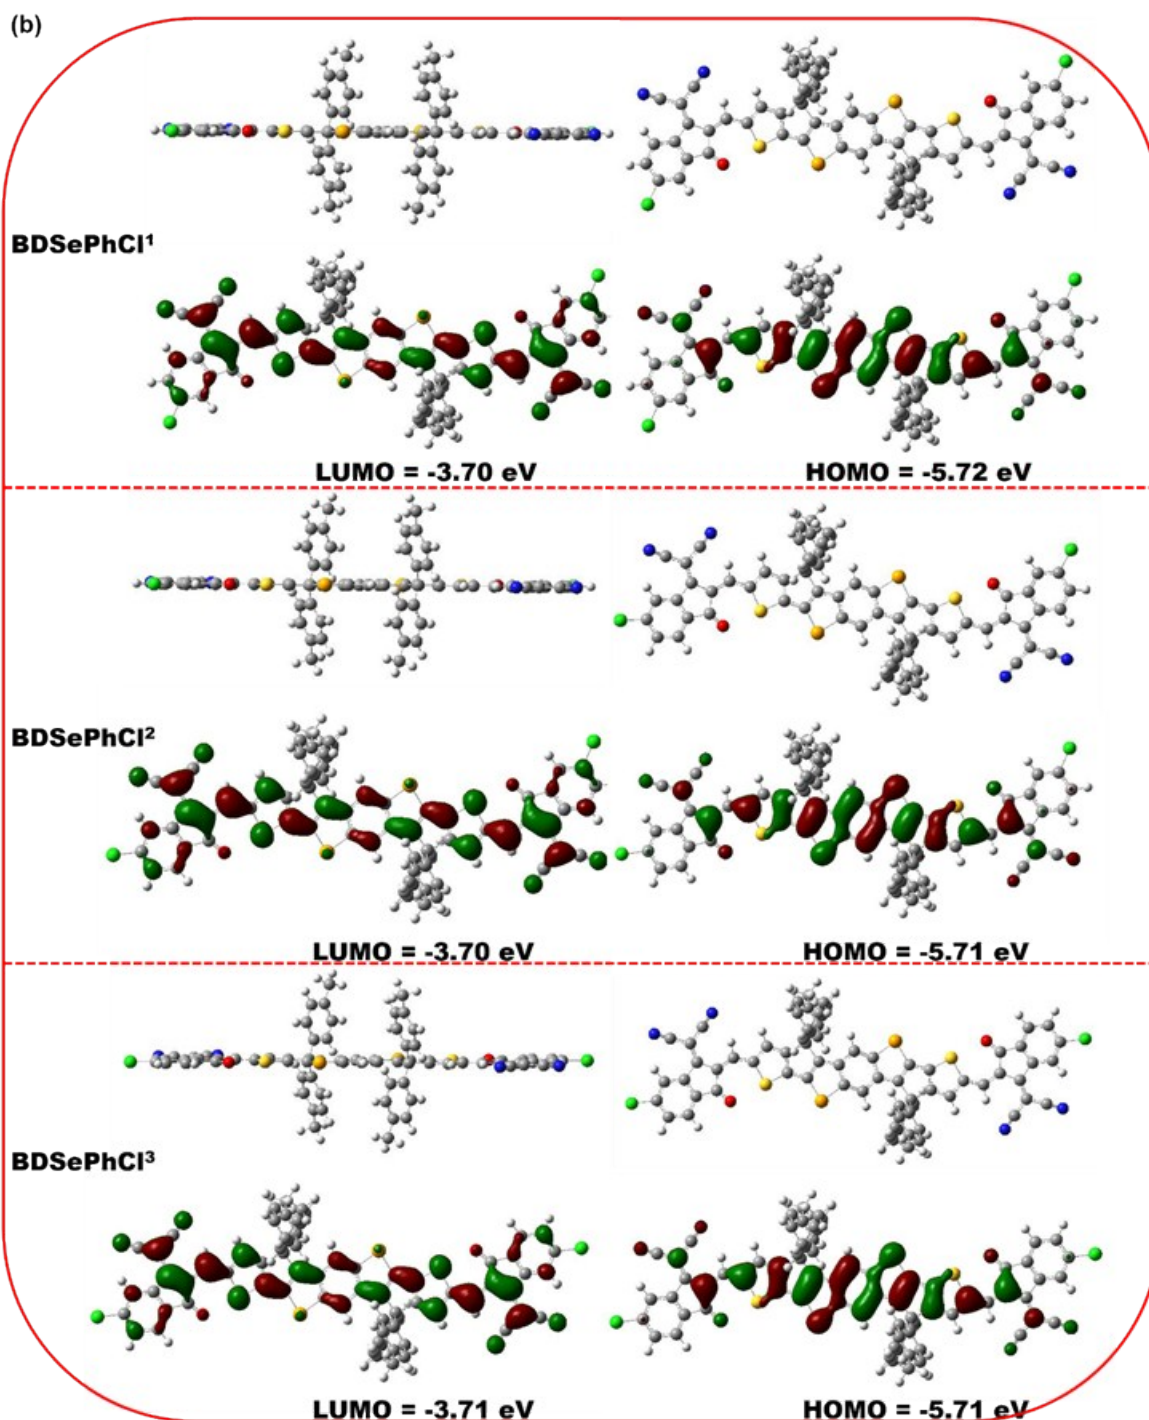

**Figure S2.** (a) Molecular geometry and energy levels for the **BDSeThCl** with three isomers. (b) Molecular geometry and energy levels for the **BDSePhCl** with three isomers.

**Table S1.** LUMO and HOMO energy levels of **BDSeThCl** (three isomers) and **BDSePhCl** (three isomers) calculated by DFT/B3LYP/6-31G, with methyl groups replacing alkyl substituents to simplify the calculations.

| NF-SMA                      | LUMO <sub>cal</sub><br>[eV] | HOMO <sub>cal</sub> [eV] | E <sub>gcal</sub> [eV] |
|-----------------------------|-----------------------------|--------------------------|------------------------|
| <b>BDSeThCl<sup>1</sup></b> | -3.59                       | -5.64                    | 2.05                   |
| <b>BDSeThCl<sup>2</sup></b> | -3.57                       | -5.64                    | 2.07                   |



|                                        |       |       |      |
|----------------------------------------|-------|-------|------|
| <b>BDS<sub>e</sub>ThCl<sup>3</sup></b> | -3.55 | -5.64 | 2.09 |
| <b>BDS<sub>e</sub>PhCl<sup>1</sup></b> | -3.70 | -5.72 | 2.02 |
| <b>BDS<sub>e</sub>PhCl<sup>2</sup></b> | -3.70 | -5.71 | 2.01 |
| <b>BDS<sub>e</sub>PhCl<sup>3</sup></b> | -3.71 | -5.71 | 2.00 |

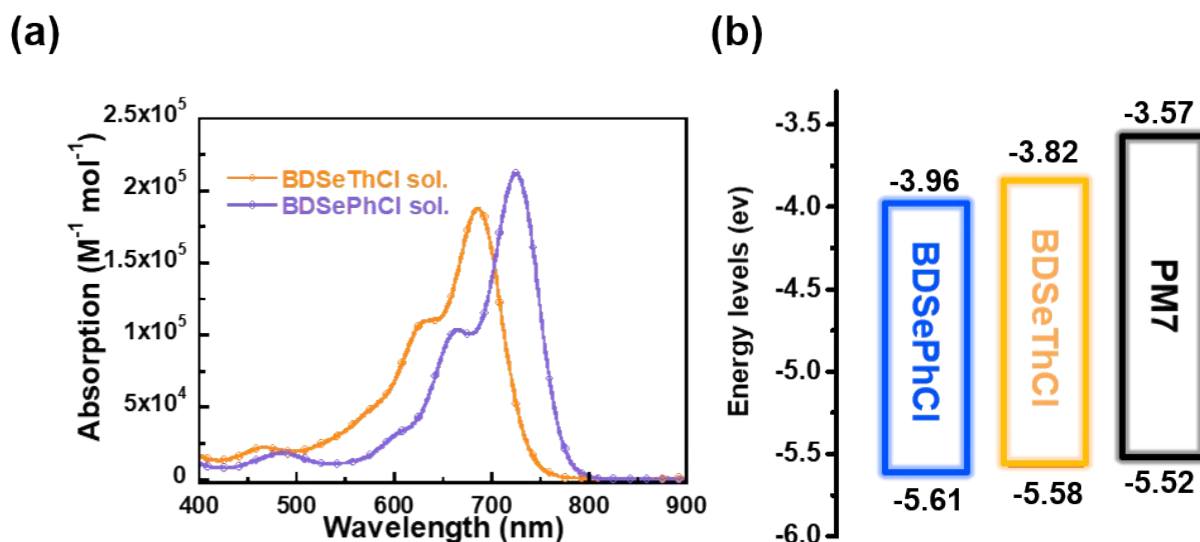

**Figure S3.** (a) Absorption spectrum of **BDS<sub>e</sub>ThCl** and **BDS<sub>e</sub>PhCl** in chloroform solutions ( $2.0 \times 10^{-5}$  M). (b) The energy levels alignment of **BDS<sub>e</sub>ThCl** and **BDS<sub>e</sub>PhCl**.

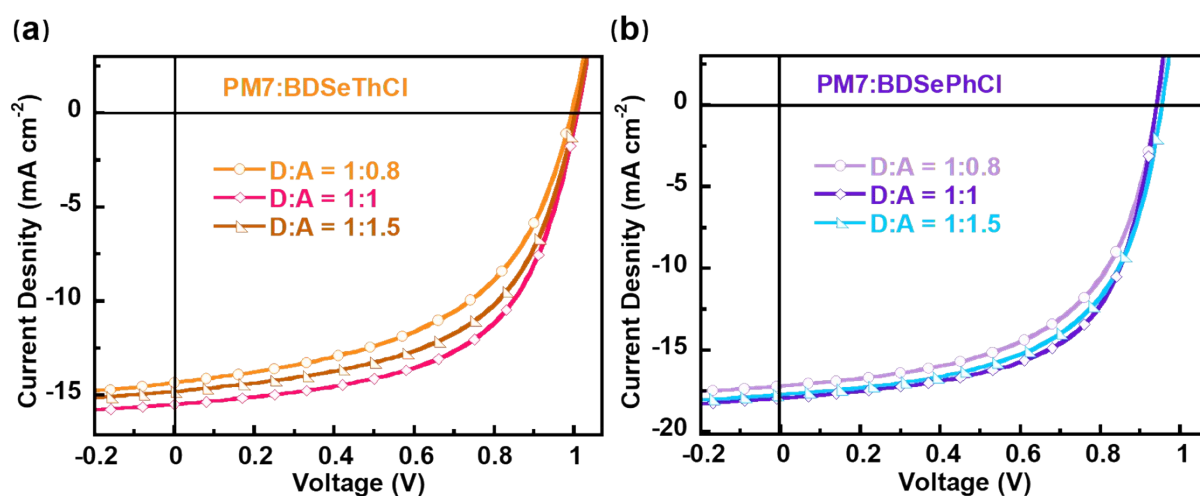

**Figure S4.** Characteristic  $J-V$  curves of (a) **PM7:BDS<sub>e</sub>ThCl**, (b) **PM7:BDS<sub>e</sub>PhCl** with different D/A ratios, under the irradiation of AM 1.5G,  $100 \text{ mW cm}^{-2}$ .

**Table S2.** The device performance parameters for the OPVs based on **PM7:BDS<sub>e</sub>ThCl/BDS<sub>e</sub>PhCl** with different D/A ratios, under the irradiation of AM 1.5G,  $100 \text{ mW cm}^{-2}$ .

| Active layer (D/A)             | D:A   | $V_{oc}$ [V] | $J_{sc}$ [mA cm <sup>-2</sup> ] | FF[%] | PCE[%] |
|--------------------------------|-------|--------------|---------------------------------|-------|--------|
| <b>PM7/BDS<sub>e</sub>ThCl</b> | 1:0.8 | 0.99         | 14.36                           | 52.0  | 7.39   |
| <b>PM7/BDS<sub>e</sub>ThCl</b> | 1:1   | 1.00         | 15.52                           | 58.2  | 9.03   |
| <b>PM7/BDS<sub>e</sub>ThCl</b> | 1:1.5 | 0.99         | 14.82                           | 56.6  | 8.30   |

|                           |       |      |       |      |       |
|---------------------------|-------|------|-------|------|-------|
| PM7/BDS <sub>2</sub> PhCl | 1:0.8 | 0.94 | 17.21 | 56.4 | 9.12  |
| PM7/BDS <sub>2</sub> PhCl | 1:1   | 0.94 | 17.95 | 60.7 | 10.23 |
| PM7/BDS <sub>2</sub> PhCl | 1:1.5 | 0.95 | 17.73 | 58.3 | 9.82  |

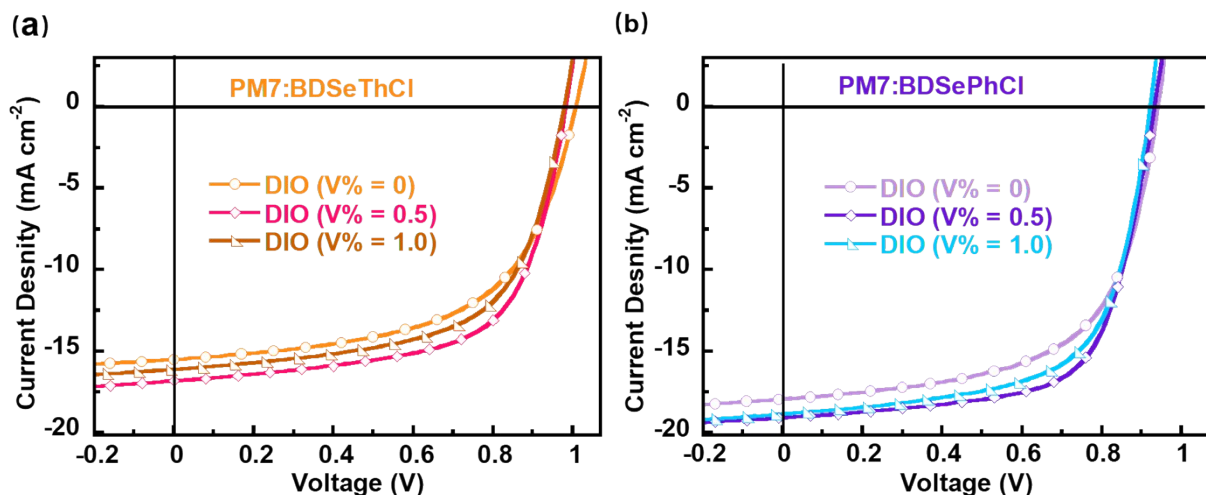

**Figure S5.** Characteristic  $J$ - $V$  curves of (a) **PM7:BDS<sub>2</sub>ThCl**, (b) **PM7:BDS<sub>2</sub>PhCl** with different DIO additive, under the irradiation of AM 1.5G, 100 mW cm<sup>-2</sup>.

**Table S3.** The device performance parameters for the OPVs based on **PM7:BDS<sub>2</sub>ThCl/BDS<sub>2</sub>PhCl** at 1:1 weight ratio with DIO additive, under the irradiation of AM 1.5G, 100 mW cm<sup>-2</sup>.

| Active layer (D/A)        | DIO(V%) | $V_{oc}$ [V] | $J_{sc}$ [mA cm <sup>-2</sup> ] | FF[%] | PCE[%] |
|---------------------------|---------|--------------|---------------------------------|-------|--------|
| PM7/BDS <sub>2</sub> ThCl | 0       | 1.0          | 15.52                           | 58.2  | 9.03   |
| PM7/BDS <sub>2</sub> ThCl | 0.5     | 0.98         | 16.83                           | 63.8  | 10.52  |
| PM7/BDS <sub>2</sub> ThCl | 1.0     | 0.97         | 16.13                           | 61.8  | 9.67   |
| PM7/BDS <sub>2</sub> PhCl | 0       | 0.94         | 17.95                           | 60.7  | 10.23  |
| PM7/BDS <sub>2</sub> PhCl | 0.5     | 0.93         | 19.11                           | 66.3  | 11.78  |
| PM7/BDS <sub>2</sub> PhCl | 1.0     | 0.92         | 18.87                           | 64.1  | 11.13  |

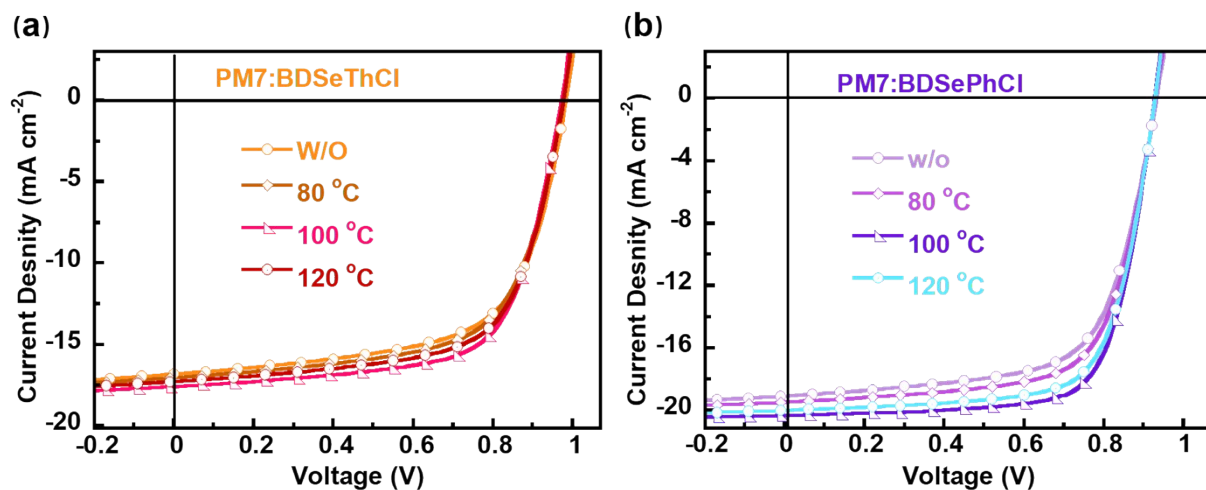



**Figure S6.** Characteristic  $J$ - $V$  curves of (a) **PM7:BDSeThCl**, (b)**PM7:BDSePhCl** at 1:1 weight ratio with different thermal annealing temperature for 10 minutes, under the irradiation of AM 1.5G, 100 mW cm<sup>-2</sup>.

**Table S4.** The device performance parameters for the OPVs based on **PM7:BDSeThCl/BDSePhCl** at 1:1 weight ratio with 0.5% DIO and different thermal annealing temperature for 10 minutes, under the irradiation of AM 1.5G, 100 mW cm<sup>-2</sup>.

| Active layer (D/A)  | Treatment(°C) | $V_{oc}$ [V] | $J_{sc}$ [mA cm <sup>-2</sup> ] | FF[%] | PCE[%] |
|---------------------|---------------|--------------|---------------------------------|-------|--------|
| <b>PM7/BDSeThCl</b> | As-cast       | 0.98         | 16.83                           | 63.8  | 10.52  |
| <b>PM7/BDSeThCl</b> | 80            | 0.97         | 17.06                           | 65.3  | 10.80  |
| <b>PM7/BDSeThCl</b> | 100           | 0.97         | 17.61                           | 67.1  | 11.46  |
| <b>PM7/BDSeThCl</b> | 120           | 0.97         | 17.30                           | 66.0  | 11.08  |
| <b>PM7/BDSePhCl</b> | As-cast       | 0.93         | 19.11                           | 66.3  | 11.78  |
| <b>PM7/BDSePhCl</b> | 80            | 0.93         | 19.51                           | 68.2  | 12.37  |
| <b>PM7/BDSePhCl</b> | 100           | 0.92         | 20.35                           | 73.1  | 13.68  |
| <b>PM7/BDSePhCl</b> | 120           | 0.92         | 20.03                           | 71.5  | 13.17  |

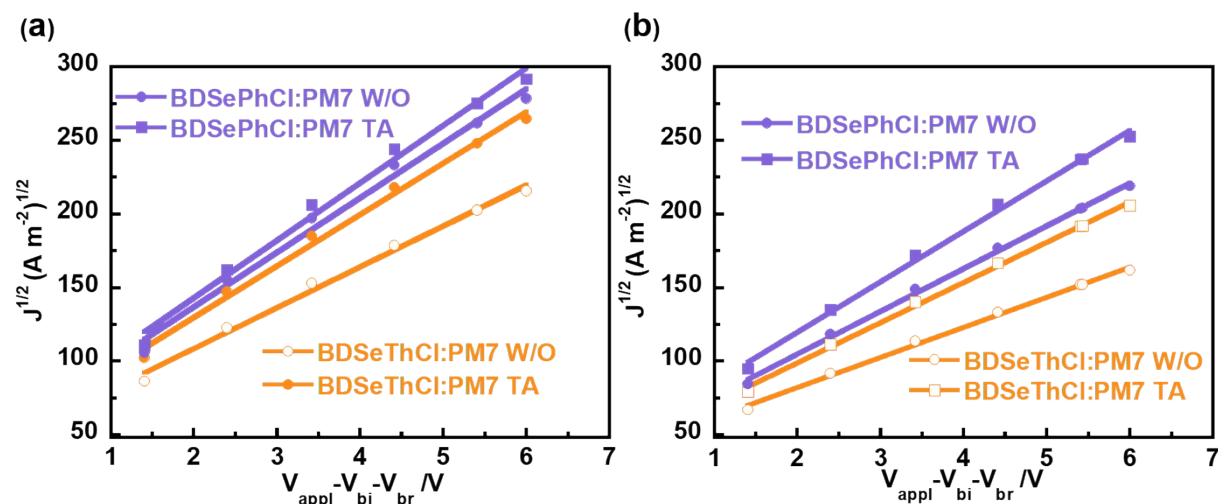

**Figure S7.** (a) The dark  $J$ - $V$  plots of electron-only devices based on as-cast/optimal **BDSeThCl:PM7** and as-cast/optimal **BDSePhCl:PM7** blend films, respectively. (b) The dark  $J$ - $V$  plots of hole-only devices based on as-cast/optimal **BDSeThCl:PM7** and as-cast/optimal **BDSePhCl:PM7** blend films, respectively.

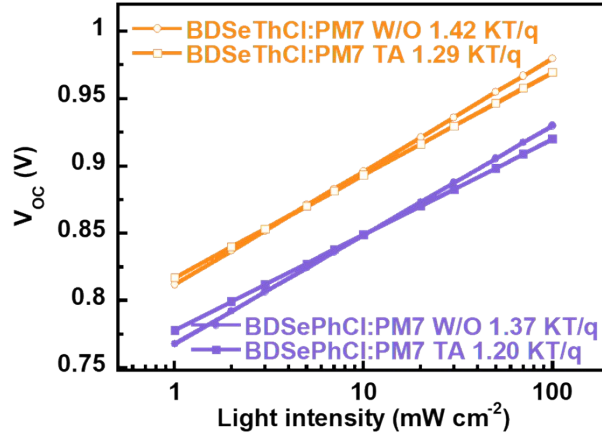

**Figure S8.** The  $V_{oc}$ - $P_{light}$  plots of the as-cast/optimal **BDSelThCl:PM7**-based and the as-cast/optimal **BDSelPhCl:PM7**-based devices.

**Table S5.** The key parameters of PSCs based on A-D-A type NF-SMAs/polymer donor based binary organic solar cells in comparison with our two NF-SMAs/**PM7** based devices.

| Active layer (D/A)     | $V_{oc}$<br>[V] | $J_{sc}$<br>[mA cm <sup>-2</sup> ] | FF<br>[%] | PCE <sub>max</sub> <sup>a)</sup><br>[%] | $E_{loss}$ <sup>b)</sup><br>[eV] | EQE <sub>max</sub> <sup>c)</sup><br>[%] | Ref. |
|------------------------|-----------------|------------------------------------|-----------|-----------------------------------------|----------------------------------|-----------------------------------------|------|
| <b>PM6/BDSelIC</b>     | 0.97            | 14.0                               | 52        | 7.1(6.8)                                | 0.54                             | —                                       | [S1] |
| <b>PM6/BDSelIC2Br</b>  | 0.89            | 20.3                               | 69        | 12.5(12.3)                              | 0.52                             | —                                       | [S1] |
| <b>PM6/BDSelIC4Br</b>  | 0.85            | 16.4                               | 69        | 9.6(9.4)                                | 0.54                             | —                                       | [S1] |
| <b>PTPDBDT/Br-ITIC</b> | 0.93            | 15.4                               | 66        | 9.4(9.1)                                | 0.60                             | 51                                      | [S2] |
| <b>PTPDBDT/F-ITIC</b>  | 0.94            | 14.1                               | 66        | 8.8(8.3)                                | 0.62                             | 64                                      | [S2] |
| <b>PTPDBDT/Cl-ITIC</b> | 0.94            | 15.6                               | 65        | 9.5(9.0)                                | 0.62                             | 66                                      | [S2] |
| <b>PTPDBDT/I-ITIC</b>  | 0.95            | 14.5                               | 65        | 8.9(8.3)                                | 0.60                             | 65                                      | [S2] |
| <b>PTPDBDT/H-ITIC</b>  | 1.04            | 10.6                               | 58        | 6.4(6.1)                                | 0.55                             | 59                                      | [S2] |
| <b>PBT1-C/TPTT-IC</b>  | 0.96            | 15.5                               | 69        | 10.5(10.3)                              | 0.67                             | 77                                      | [S3] |
| <b>PBT1-C/ITIC</b>     | 0.97            | 15.0                               | 69        | 10.2(10.0)                              | 0.63                             | 78                                      | [S3] |
| <b>PTB7-Th/6TBA</b>    | 0.98            | 15.2                               | 68        | 10.1(9.7)                               | 0.54                             | 71                                      | [S4] |
| <b>PTB7-Th/4TIC</b>    | 0.77            | 18.7                               | 71        | 10.3(9.9)                               | 0.62                             | 71                                      | [S4] |
| <b>J51/IDTIDSe-IC</b>  | 0.91            | 15.1                               | 58        | 8.0(7.8)                                | 0.61                             | 63                                      | [S5] |
| <b>PTB7-Th/A1</b>      | 0.89            | 12.5                               | 52        | 5.8(5.4)                                | 0.51                             | 78                                      | [S6] |
| <b>PTB7-Th/A2</b>      | 0.71            | 20.8                               | 62        | 9.1(8.8)                                | 0.65                             | —                                       | [S6] |
| <b>PBDB-T/ITC6-IC</b>  | 0.97            | 16.4                               | 73        | 11.6                                    | 0.63                             | 80                                      | [S7] |
| <b>PBDB-T/IDTCN</b>    | 0.85            | 12.1                               | 63        | 6.4(6.3)                                | 0.80                             | 60                                      | [S8] |
| <b>PBDB-T/ITCPTC</b>   | 0.84            | 17.5                               | 73        | 10.7(10.5)                              | 0.74                             | 80                                      | [S8] |
| <b>PBDB-T/IDT6CN</b>   | 0.83            | 15.1                               | 73        | 9.3(9.2)                                | 0.80                             | 76                                      | [S8] |

|                          |      |      |    |            |      |    |       |
|--------------------------|------|------|----|------------|------|----|-------|
| <b>PBDB-T/IDT6CN-Th</b>  | 0.81 | 16.8 | 77 | 10.4(10.3) | 0.80 | 78 | [S8]  |
| <b>PBDB-T/IDT6CN-M</b>   | 0.91 | 16.0 | 77 | 11.2(11.1) | 0.74 | 80 | [S8]  |
| <b>J61/BT-IC</b>         | 0.87 | 16.3 | 67 | 9.5(9.3)   | 0.56 | —  | [S9]  |
| <b>J71/BT-IC</b>         | 0.90 | 17.7 | 65 | 10.4(10.3) | 0.53 | 67 | [S9]  |
| <b>J71/BDT-IC</b>        | 0.92 | 17.3 | 65 | 10.9(10.5) | 0.61 | 72 | [S10] |
| <b>J71/IT-IC</b>         | 0.96 | 14.8 | 64 | 9.3(9.0)   | 0.63 | 66 | [S10] |
| <b>PBDB-T/CDTDI</b>      | 0.86 | 7.8  | 30 | 2.75(2.54) | 0.50 | 35 | [S11] |
| <b>PBDB-T/ITDI</b>       | 0.94 | 13.9 | 59 | 8.0(7.8)   | 0.59 | 62 | [S11] |
| <b>PCE-10/BT-CIC</b>     | 0.70 | 22.5 | 71 | 11.6(11.2) | 0.63 | 74 | [S12] |
| <b>PCE-10/BT-IC</b>      | 0.81 | 17.5 | 59 | 8.5(8.3)   | 0.62 | 71 | [S12] |
| <b>PTB7-Th/ITIC-2F</b>   | 0.75 | 16.2 | 70 | 8.7(8.5)   | 0.81 | 75 | [S13] |
| <b>PTB7-Th/IOTIC-2F</b>  | 0.82 | 21.9 | 65 | 12.1(11.6) | 0.50 | 78 | [S13] |
| <b>PTB7-Th/ITOTIC-2F</b> | 0.78 | 7.0  | 61 | 3.7(3.3)   | 0.54 | 28 | [S13] |
| <b>PBDB-T/IXIC</b>       | 0.82 | 20.9 | 65 | 11.3       | 0.53 | 72 | [S14] |
| <b>PBDB-T/IXIC-2C1</b>   | 0.73 | 23.6 | 70 | 12.2       | 0.57 | 76 | [S14] |
| <b>PBDB-T/IXIC-4C1</b>   | 0.69 | 22.9 | 71 | 11.2       | 0.56 | 70 | [S14] |
| <b>PBDB-T/DTNIC6</b>     | 0.96 | 7.7  | 45 | 3.3(3.2)   | 0.74 | 42 | [S15] |
| <b>PBDB-T/DTNIC8</b>     | 0.96 | 12.9 | 72 | 9.0(8.9)   | 0.77 | 76 | [S15] |
| <b>PBDB-T/IDTT2F</b>     | 0.81 | 18.5 | 59 | 8.8(8.7)   | 0.65 | 68 | [S15] |
| <b>PBDB-T/IDTOT2F</b>    | 0.85 | 20.8 | 72 | 12.7(12.5) | 0.59 | 76 | [S16] |
| <b>PBDB-T/IDTO-T-4</b>   | 0.86 | 20.1 | 72 | 12.6       | 0.59 | 70 | [S17] |
| <b>PBDB-T/IDTO-Se-4</b>  | 0.83 | 18.5 | 69 | 10.6       | 0.57 | 66 | [S17] |
| <b>PBDB-T/IDTO-TT-4</b>  | 0.85 | 17.2 | 69 | 10.2       | 0.52 | 58 | [S17] |
| <b>P1/IT-4F</b>          | 0.89 | 20.5 | 64 | 11.5(11.0) | 0.60 | —  | [S18] |
| <b>P2/IT-4F</b>          | 0.90 | 20.7 | 76 | 14.2(14.0) | 0.59 | 81 | [S18] |
| <b>P3/IT-4F</b>          | 0.90 | 20.3 | 61 | 11.2(10.8) | 0.59 | —  | [S18] |
| <b>PTQ10/TPTC</b>        | 0.95 | 4.8  | 42 | 1.97       | 0.57 | 24 | [S19] |
| <b>PTQ10/TPTIC</b>       | 0.90 | 17.1 | 67 | 10.4       | 0.59 | 68 | [S19] |
| <b>PTB7-Th/DTNR</b>      | 1.08 | 15.7 | 56 | 9.5(9.2)   | 0.64 | 72 | [S20] |

|                        |      |      |    |            |      |    |       |
|------------------------|------|------|----|------------|------|----|-------|
| <b>PBDB-T/4TIC-4F</b>  | 0.65 | 21.5 | 57 | 7.9(7.5)   | 0.66 | 75 | [S21] |
| <b>PBDB-T/6TIC-4F</b>  | 0.72 | 23.0 | 67 | 11.1(10.6) | 0.52 | 73 | [S21] |
| <b>PBDB-T/F-Br</b>     | 0.87 | 18.2 | 76 | 12.0(11.8) | 0.69 | 79 | [S22] |
| <b>PBDB-T/F-Cl</b>     | 0.87 | 17.6 | 75 | 11.5(11.3) | 0.71 | 80 | [S22] |
| <b>PBDB-T/F-F</b>      | 0.88 | 17.4 | 71 | 10.9(10.7) | 0.71 | 78 | [S22] |
| <b>PBDB-T/F-H</b>      | 0.94 | 15.0 | 67 | 9.6(9.4)   | 0.69 | 73 | [S22] |
| <b>PTB7-Th/DTPC-IC</b> | 0.86 | 8.5  | 42 | 3.1(2.8)   | 0.42 | —  | [S23] |
| <b>PTB7-Th/DFIC</b>    | 0.76 | 21.9 | 61 | 10.2(10.0) | 0.45 | 68 | [S23] |
| <b>PBDB-T/NFBDT-Me</b> | 0.91 | 17.3 | 70 | 11.0(10.8) | 0.67 | 73 | [S24] |
| <b>PBDB-T/NFBDT-F</b>  | 0.79 | 19.3 | 69 | 10.6(10.5) | 0.71 | 75 | [S24] |
| <b>FTAZ/F5IC</b>       | 0.70 | 14.4 | 52 | 5.6(5.3)   | 0.94 | 68 | [S25] |
| <b>FTAZ/F7IC</b>       | 0.74 | 18.4 | 59 | 8.2(7.8)   | 0.82 | 77 | [S25] |
| <b>FTAZ/F9IC</b>       | 0.85 | 20.2 | 66 | 11.7(11.4) | 0.64 | 78 | [S25] |
| <b>J71/IDTT-BH</b>     | 0.90 | 17.8 | 69 | 11.0(10.8) | 0.64 | —  | [S26] |
| <b>J71/IDTT-OBH</b>    | 0.92 | 14.7 | 61 | 8.0(7.9)   | 0.65 | —  | [S26] |
| <b>PDCBT/IDTT-BH</b>   | 0.88 | 17.1 | 68 | 10.4(10.1) | 0.66 | 70 | [S26] |
| <b>PDCBT/IDTT-OBH</b>  | 0.91 | 14.0 | 65 | 8.2(8.1)   | 0.66 | —  | [S26] |
| <b>PBDB-T/IDTT-BH</b>  | 0.85 | 16.9 | 69 | 9.9(9.8)   | 0.69 | —  | [S26] |
| <b>PBDB-T/IDTT-OBH</b> | 0.87 | 17.5 | 72 | 10.9(10.8) | 0.70 | 66 | [S26] |
| <b>PBTIBDTT/ITIC-F</b> | 0.92 | 16.4 | 74 | 11.2(10.9) | 0.64 | 69 | [S27] |
| <b>PBDB-T/NITI</b>     | 0.86 | 20.5 | 71 | 12.7       | 0.63 | 81 | [S28] |
| <b>PBDB-T/IT-OM-1</b>  | 1.01 | 12.3 | 51 | 6.3(6.0)   | 0.66 | —  | [S29] |
| <b>PBDB-T/IT-OM-2</b>  | 0.93 | 17.5 | 73 | 11.9(11.5) | 0.66 | —  | [S29] |
| <b>PBDB-T/IT-OM-3</b>  | 0.97 | 16.4 | 68 | 10.8(10.5) | 0.67 | —  | [S29] |
| <b>PBDB-T/IT-OM-4</b>  | 0.96 | 14.7 | 56 | 7.9(7.5)   | 0.67 | —  | [S29] |
| <b>PTB7-Th/IHIC</b>    | 0.75 | 19.0 | 68 | 9.8(9.4)   | 0.63 | 73 | [S30] |
| <b>PTB7-Th/FOIC</b>    | 0.74 | 23.5 | 67 | 12.0(11.6) | 0.58 | 81 | [S31] |
| <b>PTB7-Th/ITIC3</b>   | 0.76 | 17.0 | 62 | 8.1(8.0)   | 0.79 | —  | [S31] |
| <b>PTB7-Th/DICTF</b>   | 0.85 | 16.3 | 55 | 7.9(7.6)   | 1.04 | 67 | [S32] |
| <b>PTB7-Th/COi7IC</b>  | 0.82 | 13.1 | 58 | 6.3(6.2)   | 0.78 | 66 | [S33] |

|                         |      |      |      |            |      |    |       |
|-------------------------|------|------|------|------------|------|----|-------|
| <b>PTB7-Th/COi7DFIC</b> | 0.67 | 17.3 | 71   | 8.3(8.0)   | 0.88 | 71 | [S33] |
| <b>PBDB-T/NNBDT</b>     | 0.88 | 18.6 | 71   | 11.7(11.5) | 0.55 | 69 | [S34] |
| <b>PBDB-T/FDNCTF</b>    | 0.91 | 16.0 | 74   | 10.8(10.6) | 0.69 | 76 | [S34] |
| <b>PBDB-T/DCF-2HT</b>   | 1.02 | 11.3 | 50   | 5.7(5.5)   | 0.91 | 68 | [S35] |
| <b>PTB7-Th/DCF-2HT</b>  | 0.96 | 12.4 | 40   | 4.8(4.6)   | 0.87 | —  | [S35] |
| <b>PBDB-T/NTIC</b>      | 0.94 | 13.6 | 68   | 8.6(8.5)   | 0.74 | 71 | [S36] |
| <b>PBDB-T/NTIC-Me</b>   | 0.96 | 13.0 | 66   | 8.3(8.1)   | 0.78 | 69 | [S36] |
| <b>PBDB-T/NTIC-OMe</b>  | 0.97 | 13.5 | 66   | 8.6(8.5)   | 0.74 | 68 | [S36] |
| <b>PBDB-T/NTIC-F</b>    | 0.81 | 15.0 | 66   | 8.1(7.9)   | 0.85 | 74 | [S36] |
| <b>PBDB-T/F-M</b>       | 0.98 | 14.6 | 71   | 10.3(10.1) | 0.67 | —  | [S37] |
| <b>PTB7-Th/NOBDT</b>    | 0.77 | 19.2 | 70   | 10.6(10.3) | 0.62 | —  | [S37] |
| <b>PBDB-T/DICTF</b>     | 0.93 | 10.3 | 60   | 5.9(5.7)   | 0.97 | 58 | [S38] |
| <b>PBDB-T/FDICTF</b>    | 0.94 | 15.8 | 66   | 10.1(9.8)  | 0.69 | 75 | [S38] |
| <b>FTAZ/IDIC</b>        | 0.84 | 20.8 | 72   | 12.5(12.1) | 0.76 | 79 | [S39] |
| <b>FTAZ/IDIC1</b>       | 0.90 | 13.6 | 59   | 7.1(7.0)   | 0.77 | 77 | [S40] |
| <b>FTAZ/IHIC1</b>       | 0.95 | 14.3 | 68   | 9.2(8.9)   | 0.74 | —  | [S40] |
| <b>FTAZ/ITIC-Th</b>     | 0.92 | 15.8 | 61   | 8.9(8.7)   | 0.69 | —  | [S41] |
| <b>FTAZ/ITIC-Th1</b>    | 0.85 | 19.3 | 74   | 12.1(11.9) | 0.70 | 80 | [S41] |
| <b>FTAZ/ITIC-Th2</b>    | 0.75 | 17.2 | 70   | 9.1(8.9)   | 0.79 | —  | [S41] |
| <b>FTAZ/ITIC-Th3</b>    | 0.96 | 16.3 | 68   | 10.7(10.6) | 0.67 | —  | [S41] |
| <b>PTB7-Th/IUIC</b>     | 0.80 | 21.7 | 0.65 | 11.2(11.0) | 0.61 | 80 | [S42] |
| <b>PBDB-T/DICTiF</b>    | 0.98 | 11.2 | 65   | 7.1(6.9)   | 0.77 | —  | [S43] |
| <b>PBDB-T-2F/IT-2Cl</b> | 0.92 | 19.1 | 75   | 13.2(13.0) | 0.63 | —  | [S44] |
| <b>PBDB-T-2F/IT-4Cl</b> | 0.79 | 22.7 | 75   | 13.5(13.2) | 0.69 | 80 | [S44] |
| <b>FTAZ/IHIC2</b>       | 0.78 | 15.7 | 61   | 7.5(7.3)   | 0.89 | —  | [S45] |
| <b>FTAZ/IOIC2</b>       | 0.90 | 19.7 | 69   | 12.3(12.1) | 0.65 | 83 | [S45] |
| <b>PTB7-Th/F6IC</b>     | 0.61 | 18.5 | 64   | 7.1(6.8)   | 0.61 | 80 | [S46] |
| <b>PTB7-Th/F8IC</b>     | 0.64 | 25.1 | 68   | 10.9(10.5) | 0.53 | —  | [S46] |
| <b>PTB7-Th/F10IC</b>    | 0.73 | 20.8 | 67   | 10.2(10.0) | 0.52 | —  | [S46] |
| <b>PTB7-Th/IDT-FBTR</b> | 1.02 | 15.2 | 58   | 9.1(8.9)   | 0.65 | 74 | [S47] |
| <b>FTAZ/INIC</b>        | 0.96 | 13.5 | 58   | 7.7(7.5)   | 0.61 | —  | [S48] |

|                        |      |      |    |            |      |    |       |
|------------------------|------|------|----|------------|------|----|-------|
| <b>FTAZ/INIC1</b>      | 0.93 | 16.6 | 64 | 10.1(9.9)  | 0.63 | —  | [S48] |
| <b>FTAZ/INIC2</b>      | 0.90 | 17.6 | 67 | 10.8(10.6) | 0.62 | —  | [S48] |
| <b>FTAZ/INIC3</b>      | 0.86 | 19.4 | 67 | 11.5(11.2) | 0.62 | 77 | [S48] |
| <b>PBTA-TF/ITCC</b>    | 1.00 | 15.5 | 67 | 10.4(10.1) | 0.67 | —  | [S49] |
| <b>PBTA-TF/IT-M</b>    | 0.97 | 17.8 | 71 | 12.2(11.9) | 0.76 | —  | [S49] |
| <b>PBTA-TF/IT-4F</b>   | 0.73 | 20.2 | 72 | 10.6(10.1) | 0.62 | —  | [S49] |
| <b>PBDB-T/FDNCTF</b>   | 0.93 | 16.3 | 73 | 11.2(10.9) | 0.67 | —  | [S50] |
| <b>PTB7-Th/IOIC2</b>   | 0.83 | 17.2 | 66 | 9.3(9.1)   | 0.71 | 78 | [S51] |
| <b>PTB7-Th/IOIC3</b>   | 0.76 | 22.9 | 75 | 13.1(12.8) | 0.69 | 86 | [S51] |
| <b>PBQ-0F/ITIC</b>     | 0.69 | 16.1 | 60 | 6.7        | 0.92 | —  | [S52] |
| <b>PBQ-QF/ITIC</b>     | 0.83 | 17.1 | 62 | 8.9        | 0.78 | —  | [S52] |
| <b>PBQ-4F/ITIC</b>     | 0.95 | 17.9 | 67 | 11.3       | 0.66 | —  | [S52] |
| <b>J71/ITVIC</b>       | 0.89 | 14.5 | 58 | 7.3(7.1)   | 0.51 | —  | [S53] |
| <b>J71/ITVfIC</b>      | 0.84 | 19.7 | 59 | 9.7(9.5)   | 0.53 | —  | [S53] |
| <b>J71/ITVffIC</b>     | 0.81 | 20.6 | 63 | 10.5(10.2) | 0.54 | 81 | [S53] |
| <b>PTQ10/m-ITIC-2F</b> | 0.96 | 18.9 | 69 | 12.5(12.0) | 0.61 | —  | [S54] |
| <b>PTQ10/m-ITIC-4F</b> | 0.90 | 19.8 | 70 | 12.5(12.0) | 0.63 | 83 | [S54] |
| <b>PCE-10/BT-CIC</b>   | 0.70 | 22.5 | 71 | 11.6(11.2) | 0.63 | —  | [S55] |
| <b>PBDB-T/TTIC</b>     | 0.77 | 22.3 | 62 | 10.6(10.3) | 0.63 | 63 | [S56] |
| <b>PBDB-T/TTIC-M</b>   | 0.80 | 20.5 | 70 | 11.5(11.4) | 0.64 | 68 | [S55] |
| <b>PBDB-T/IDT-BC6</b>  | 0.91 | 5.6  | 44 | 2.3(2.2)   | 0.83 | 36 | [S57] |
| <b>PBDB-T/IDT-BOC6</b> | 1.01 | 17.5 | 54 | 9.6(9.4)   | 0.62 | 80 | [S57] |
| <b>J71/ITCPTC</b>      | 0.89 | 17.7 | 74 | 11.6(11.3) | 0.68 | —  | [S58] |
| <b>J71/MeIC</b>        | 0.92 | 18.5 | 74 | 12.5(12.1) | 0.66 | 74 | [S58] |
| <b>PBDB-T/BTCN-O</b>   | 0.95 | 5.0  | 34 | 1.62(1.61) | 0.67 | —  | [S59] |
| <b>PBDB-T/BTCN-M</b>   | 0.98 | 12.0 | 50 | 5.9(5.7)   | 0.65 | —  | [S59] |
| <b>PBDB-T/ZITI</b>     | 0.89 | 19.8 | 74 | 13.0(12.9) | 0.64 | 80 | [S60] |
| <b>J71/ZITI</b>        | 0.93 | 20.4 | 69 | 13.2(13.0) | 0.60 | 79 | [S60] |
| <b>PBDB-T/IDTC</b>     | 0.92 | 16.6 | 61 | 9.3(9.0)   | 0.59 | 70 | [S61] |
| <b>PBDB-T/IDTO</b>     | 0.94 | 16.3 | 65 | 10.0(9.7)  | 0.57 | 65 | [S61] |
| <b>PBDB-T/IDT-2B</b>   | 0.89 | 13.3 | 54 | 6.4(6.3)   | 0.84 | —  | [S62] |



|                          |      |      |    |            |      |    |       |
|--------------------------|------|------|----|------------|------|----|-------|
| <b>PBDB-T/IDT-OB</b>     | 0.88 | 16.1 | 71 | 10.1(9.9)  | 0.78 | —  | [S62] |
| <b>PBDB-T/IDT-2O</b>     | 0.86 | 15.6 | 72 | 9.7(9.6)   | 0.78 | 75 | [S62] |
| <b>PBDB-TF/HFO-PCIC</b>  | 0.93 | 12.6 | 71 | 8.36       | 0.55 | —  | [S63] |
| <b>PBDB-TF/OF-PCIC</b>   | 0.91 | 13.8 | 73 | 9.1        | 0.68 | —  | [S63] |
| <b>PBDB-TF/HF-PCIC</b>   | 0.91 | 17.8 | 71 | 11.5       | 0.59 | 75 | [S63] |
| <b>PBDB-T/IT-IC</b>      | 0.90 | 16.8 | 74 | 11.2(10.7) | 0.67 | —  | [S64] |
| <b>PBDB-T/IT-M</b>       | 0.94 | 17.4 | 74 | 12.1(11.5) | 0.66 | 77 | [S64] |
| <b>PBDB-T/IT-DM</b>      | 0.97 | 16.5 | 71 | 11.3(10.8) | 0.66 | 75 | [S64] |
| <b>J52/IEICO-4CI</b>     | 0.70 | 23.8 | 61 | 10.1       | 0.53 | —  | [S65] |
| <b>PBDB-T/IEICO-4CI</b>  | 0.74 | 20.8 | 63 | 9.7        | 0.56 | —  | [S65] |
| <b>PTB7-Th/IEICO-4CI</b> | 0.73 | 22.8 | 62 | 10.3       | 0.57 | —  | [S65] |
| <b>PBDB-T/NCBDT</b>      | 0.84 | 20.3 | 71 | 12.1(11.6) | 0.61 | 74 | [S66] |
| <b>PBDB-T/TTIC</b>       | 0.80 | 20.6 | 66 | 10.9(10.7) | 0.58 | 68 | [S67] |
| <b>PBDB-T/TTIC-F</b>     | 0.71 | 21.3 | 63 | 9.5(9.4)   | 0.64 | 65 | [S67] |
| <b>PTB7-TH/ITIC</b>      | 0.81 | 14.2 | 59 | 6.8(6.6)   | 0.78 | 73 | [S68] |
| <b>PTB7-Th/IDT-IC</b>    | 0.83 | 9.5  | 40 | 3.2(3.1)   | 0.89 | 50 | [S69] |
| <b>PTB7-Th/IDTIDT-IC</b> | 0.94 | 14.5 | 48 | 6.5(6.3)   | 0.59 | 63 | [S69] |
| <b>PEDTTT-E-T/IEIC</b>   | 0.90 | 11.7 | 47 | 4.9(4.7)   | 0.60 | 50 | [S70] |
| <b>PEDTTT-E-T/IEICO</b>  | 0.82 | 17.7 | 58 | 8.4(8.3)   | 0.52 | 66 | [S70] |
| <b>PBDB-T-SF/IT-4F</b>   | 0.88 | 20.9 | 71 | 13.1(13.0) | 0.61 | 83 | [S71] |
| <b>PDCBT-2F/IT-M</b>     | 1.13 | 10.4 | 56 | 6.6        | 0.46 | 50 | [S72] |
| <b>PBDB-T/INPIC</b>      | 0.96 | 8.5  | 53 | 4.3(4.2)   | 0.50 | —  | [S73] |
| <b>PBDB-T/INPIC-4F</b>   | 0.85 | 21.6 | 72 | 13.1(13.0) | 0.54 | —  | [S73] |
| <b>PBDB-T/ITIC-C6</b>    | 0.87 | 15.6 | 65 | 9.2(8.8)   | 0.72 | —  | [S74] |
| <b>PBDB-TF/ITIC-C6</b>   | 0.98 | 14.4 | 64 | 9.3(9.1)   | 0.61 | —  | [S74] |
| <b>PBDB-T/ITIC-C9</b>    | 0.87 | 15.1 | 69 | 9.5(9.0)   | 0.72 | 75 | [S74] |
| <b>PBDB-TF/ITIC-C9</b>   | 0.99 | 14.5 | 67 | 10.2(9.5)  | 0.60 | —  | [S74] |
| <b>FTAZ/ITIC-Th</b>      | 0.92 | 15.8 | 61 | 8.9(8.7)   | 0.69 | 80 | [S75] |
| <b>FTAZ/ITIC-Th1</b>     | 0.85 | 19.3 | 74 | 12.1(11.9) | 0.71 | —  | [S75] |

|                            |      |      |    |            |      |    |       |
|----------------------------|------|------|----|------------|------|----|-------|
| <b>PDBT-T1/IC-C6IDT-IC</b> | 0.89 | 15.1 | 65 | 8.7(8.5)   | 0.73 | 76 | [S76] |
| <b>J61/ITIC</b>            | 0.90 | 17.9 | 65 | 10.5(10.3) | 0.69 | 78 | [S77] |
| <b>J61/m-ITIC</b>          | 0.91 | 18.3 | 70 | 11.8(11.5) | 0.69 | 80 | [S77] |
| <b>PTB7-Th/ITIC-Th</b>     | 0.80 | 15.9 | 68 | 8.7(8.5)   | 0.80 | 80 | [S78] |
| <b>PDBT-T1/ITIC-Th</b>     | 0.88 | 16.1 | 67 | 9.6(9.3)   | 0.72 | —  | [S78] |
| <b>PBDTTT-EFT/IEICO-4F</b> | 0.74 | 22.8 | 59 | 10.0(9.7)  | 0.50 | 72 | [S79] |
| <b>J52/IEICO-4F</b>        | 0.73 | 21.9 | 58 | 9.4(9.3)   | 0.51 | 74 | [S79] |
| <b>PM6/ITIC</b>            | 1.04 | 16   | 58 | 9.7(9.5)   | 0.51 | 71 | [S80] |
| <b>PBDB-TF/IDTI</b>        | 0.99 | 13.0 | 57 | 7.4(6.9)   | 0.73 | —  | [S81] |
| <b>PBDB-TF/IDTN</b>        | 0.95 | 16.8 | 78 | 12.2(12.0) | 0.64 | 74 | [S81] |
| <b>PTB7-Th/6TIC</b>        | 0.83 | 20.1 | 66 | 11.1(10.7) | 0.54 | —  | [S82] |
| <b>PTB7-TH/IEIC</b>        | 0.97 | 13.6 | 48 | 6.3(6.1)   | 0.60 | 57 | [S83] |
| <b>PTB7-Th/Th-4TIC</b>     | 0.77 | 18.8 | 72 | 10.4(9.9)  | 0.63 | 69 | [S84] |
| <b>PBDB-T/Th-ITIC</b>      | 0.92 | 16.1 | 71 | 10.6       | 0.49 | 69 | [S84] |
| <b>PM6/IT-4F</b>           | 0.84 | 22.2 | 73 | 13.5(13.2) | 0.65 | 87 | [S85] |
| <b>PBDB-T1/ITIC</b>        | 0.87 | 15.4 | 64 | 8.6(8.3)   | 0.68 | —  | [S86] |
| <b>PBDB-T1/ITTIC</b>       | 0.92 | 15.9 | 62 | 9.1(8.9)   | 0.54 | —  | [S86] |
| <b>FTAZ/ITIC1</b>          | 0.92 | 15.8 | 56 | 8.1(8.0)   | 0.63 | —  | [S87] |
| <b>FTAZ/ITIC2</b>          | 0.93 | 18.9 | 63 | 11.0(10.6) | 0.61 | 78 | [S87] |
| <b>PBDTTT-C-T/DC-IDT2T</b> | 0.90 | 8.3  | 52 | 3.9(3.7)   | 0.65 | 41 | [S88] |
| <b>PBDB-T/ITCPTC-Th</b>    | 0.86 | 17.1 | 73 | 10.6(10.3) | 0.74 | 81 | [S89] |
| <b>PBDB-T/ITCPTC-Se</b>    | 0.87 | 15.2 | 68 | 9.0(8.8)   | 0.72 | —  | [S89] |
| <b>PBDB-T/BDTIT-M</b>      | 0.90 | 17.6 | 71 | 11.3(11.0) | 0.65 | 78 | [S90] |
| <b>PBDB-T/BDThIT-M</b>     | 0.94 | 18.0 | 71 | 12.1(11.9) | 0.59 | 78 | [S90] |
| <b>PM6/IDIC</b>            | 0.97 | 17.8 | 69 | 11.9(11.7) | 0.59 | 80 | [S91] |
| <b>PTB7-Th/FNIC1</b>       | 0.77 | 19.9 | 66 | 10.2(10.0) | 0.71 | 79 | [S92] |
| <b>PTB7-Th/FNIC2</b>       | 0.73 | 23.9 | 73 | 13.0(12.7) | 0.64 | 80 | [S92] |
| <b>PBDB-T-SF/NCBDT-4Cl</b> | 0.85 | 22.3 | 74 | 14.1       | 0.55 | —  | [S93] |

|                                    |             |             |           |             |             |           |                  |
|------------------------------------|-------------|-------------|-----------|-------------|-------------|-----------|------------------|
| <b>PBDB-T2Cl/IDIC-4H</b>           | 0.98        | 10.3        | 45        | 4.5         | 0.71        | 59        | [S94]            |
| <b>PBDB-T2Cl/IDIC-4F</b>           | 0.88        | 13.0        | 61        | 7.1         | 0.78        | 66        | [S94]            |
| <b>PBDB-T2Cl/IDIC-4Cl</b>          | 0.83        | 16.2        | 68        | 9.2         | 0.75        | 73        | [S94]            |
| <b>PM6/SeTIC</b>                   | 0.95        | 15.5        | 51        | 7.4         | 0.63        | —         | [S95]            |
| <b>PM6/SeTIC-4Cl</b>               | 0.78        | 22.9        | 75        | 13.3        | 0.66        | 83        | [S95]            |
| <b>PBDB-T/AT-NC</b>                | 0.91        | 17.1        | 69        | 10.9        | 0.71        | 77        | [S96]            |
| <b>PBDB-T/AT-4Cl</b>               | 0.90        | 19.5        | 75        | 13.3        | 0.70        | 83        | [S96]            |
| <b>FTAZ/IDCIC</b>                  | 0.87        | 21.9        | 71        | 13.5        | 0.58        | 81        | [S97]            |
| <b>PBDB-TF/IDIC-C4Ph (TA)</b>      | 0.94        | 19.1        | 78        | 14.0        | 0.68        | 83        | [S98]            |
| <b>PBDB-TF/IDIC-C4Ph (as-cast)</b> | 0.95        | 18.1        | 76        | 13.2        | 0.67        | 80        | [S98]            |
| <b>PBDB-TF/IDIC-C4Ph (TA+DIO)</b>  | 0.93        | 18.9        | 77        | 13.5        | 0.69        | —         | [S98]            |
| <b>PTB7-Th/COi8DFIC</b>            | 0.69        | 27.3        | 71        | 13.8        | 0.57        | —         | [S99]            |
| <b>PTB7-Th/COi8DFIC</b>            | 0.69        | 26.2        | 71        | 13.2        | 0.57        | —         | [S99]            |
| <b>PM7/BDS<sub>e</sub>ThCl</b>     | <b>0.97</b> | <b>17.8</b> | <b>69</b> | <b>11.9</b> | <b>0.58</b> | <b>80</b> | <b>This work</b> |
| <b>PM7/BDS<sub>e</sub>PhCl</b>     | <b>0.92</b> | <b>20.3</b> | <b>73</b> | <b>13.7</b> | <b>0.49</b> | <b>80</b> | <b>This work</b> |

<sup>a</sup>The values in parentheses are the average PCE values. <sup>b</sup> $E_{\text{loss}} = E_g - eV_{\text{oc}}$ , where  $E_g$  is the lowest energy bandgap of the donor and acceptor components. <sup>c</sup> “—” don't involve the maximum data in the literature.

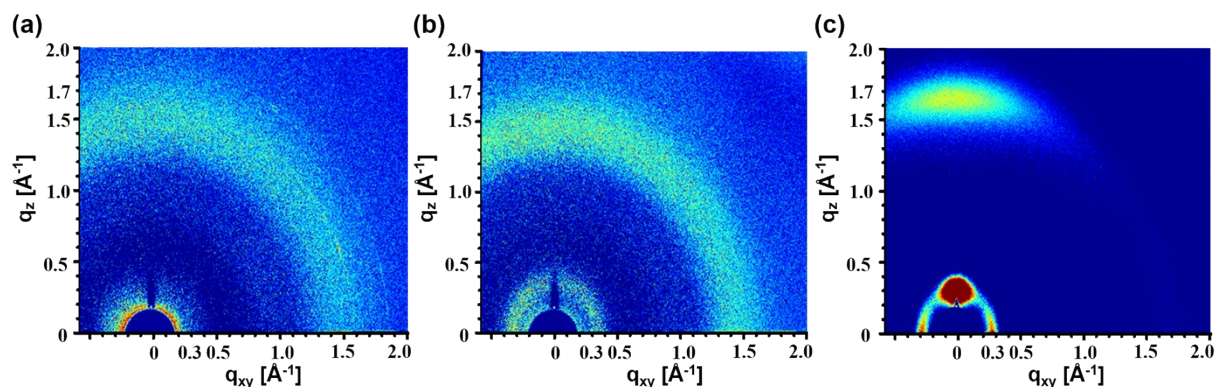

**Figure S9.** GIXD patterns for pure **BDS<sub>e</sub>ThCl**, **BDS<sub>e</sub>PhCl**, and **PM7** neat films.

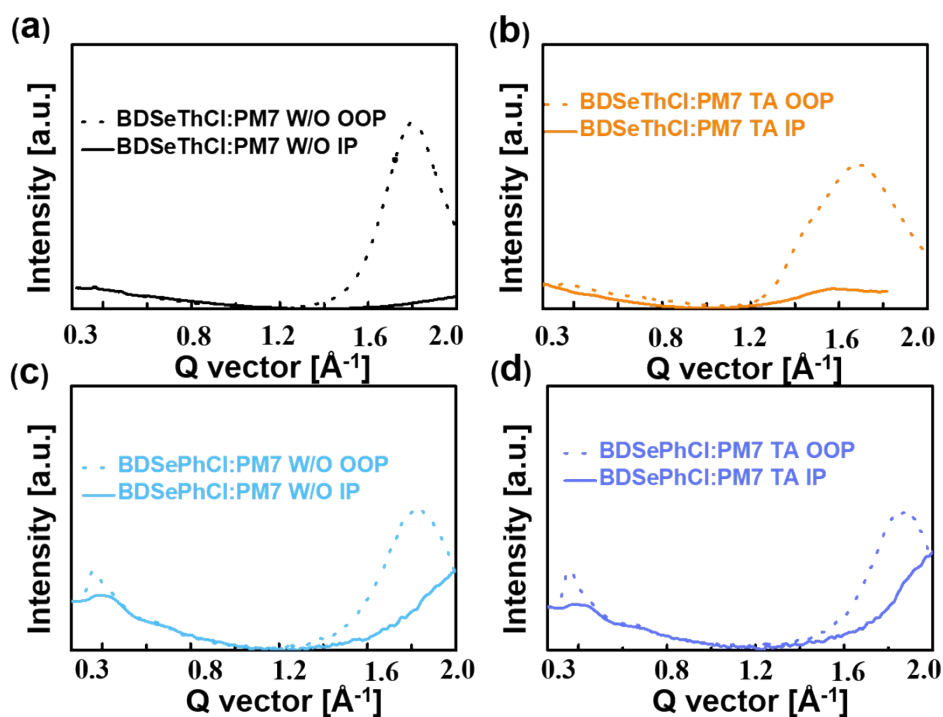

**Figure S10.** The out-of plane (dotted line) and in-plane (solid line) line-cuts in GIXD for the PM7:BDSerThCl or PM7:BDSerPhCl blend films.

## References

- [S1] S.-S. Wan, C. Chang, J.-L. Wang, G.-Z. Yuan, Q. Wu, M. Zhang and Y. Li, *Sol. RRL*, 2018, **2**, 1800250.
- [S2] F. Yang, C. Li, W. Lai, A. Zhang, H. Huang and W. Li, *Mater. Chem. Front.*, 2017, **1**, 1389-1395.
- [S3] C. Li, Y. Xie, B. Fan, G. Han, Y. Yi and Y. Sun, *J. Mater. Chem. C*, 2018, **6**, 4873-4877.
- [S4] L. Zuo, X. Shi, S. B. Jo, Y. Liu, F. Lin and A. K.-Y. Jen, *Adv. Mater.*, 2018, **30**, 1706816.
- [S5] Y. Li, D. Qian, L. Zhong, J.-D. Lin, Z.-Q. Jiang, Z.-G. Zhang, Z. Zhang, Y. Li, L.-S. Liao and F. Zhang, *Nano Energy*, 2016, **27**, 430-438.
- [S6] H. Xu, Y. Yang, C. Zhong, X. Zhan and X. Chen, *J. Mater. Chem. A*, 2018, **6**, 6393-6401.
- [S7] Z. Zhang, J. Yu, X. Yin, Z. Hu, Y. Jiang, J. Sun, J. Zhou, F. Zhang, T. P. Russel, F. Liu and W. Tang, *Adv. Funct. Mater.*, 2018, **28**, 1705095.
- [S8] W. Gao, M. Zhang, T. Liu, R. Ming, Q. An, K. Wu, D. Xie, Z. Luo, C. Zhong, F. Liu, F. Zhang, H. Yan and C. Yang, *Adv. Mater.*, 2018, **30**, 1800052.
- [S9] Y. Li, L. Zhong, B. Gautam, H.-J. Bin, J.-D. Lin, F.-P. Wu, Z. Zhang, Z.-Q. Jiang, Z.-G. Zhang, K. Gundogdu, Y. Li and L.-S. Liao, *Energy Environ. Sci.* 2017, **10**, 1610-1620.
- [S10] Y. Li, L. Zhong, J.-D. Lin, F.-P. Wu, H.-J. Bin, Z. Zhang, L. Xu, Z.-Q. Jiang, Z.-G. Zhang, F. Liu, T. P. Russell and Y. Li, *Sol. RRL*. 2017, **1**, 1700107.
- [S11] Z. Kang, S.-C. Chen, Y. Ma, J. Wang and Q. Zheng, *ACS Appl. Mater. Interfaces*. 2017, **9**, 24771-24777.
- [S12] Y. Li, J.-D. Lin, X. Che, Y. Qu, F. Liu, L.-S. Liao and S. R. Forrest, *J. Am. Chem. Soc.*, 2017, **139**, 17114-17119.
- [S13] J. Lee, S.-J. Ko, M. Seifrid, H. Lee, C. McDowell, B. R. Luginbuhl, A. Karki, K. Cho, T.-Q. Nguyen and G. C. Bazan, *Adv. Energy Mater.*, 2018, **8**, 1801209.
- [S14] Y. Chen, T. Liu, H. Hu, T. Ma, J. Y. L. Lai, J. Zhang, H. Ade and H. Yan, *Adv. Energy Mater.*, 2018, **8**, 1801203.

- [S15] Y. Ma, M. Zhang, Y. Yan, J. Xin, T. Wang, W. Ma, C. Tang and Q. Zheng, *Chem. Mater.*, 2017, **29**, 7942-7952.
- [S16] Y. Liu, M. Li, X. Zhou, Q.-Q. Jia, S. Feng, P. Jiang, X. Xu, W. Ma, H.-B. Li and Z. Bo, *ACS Energy Lett.*, 2018, **3**, 1832-1839.
- [S17] D. Liu, B. Kan, X. Ke, N. Zhang, Z. Xie, D. Lu and Y. Liu, *Adv. Energy Mater.*, 2018, **8**, 1801618.
- [S18] S. Li, L. Ye, W. Zhao, H. Yan, B. Yang, D. Liu, W. Li, H. Ade and J. Hou, *J. Am. Chem. Soc.*, 2018, **140**, 7159-7167.
- [S19] X. Li, H. Huang, Z. Peng, C. Sun, D. Yang, J. Zhou, A. Liebman-Pelaez, C. Zhu, Z.-G. Zhang, Z. Zhang, Z. Xie, H. Ade and Y. Li, *J. Mater. Chem. A.*, 2018, **6**, 15933-15941.
- [S20] Y. Ma, M. Zhang, Y. Tang, W. Ma and Q. Zheng, *Chem. Mater.*, 2017, **29**, 9775-9785.
- [S21] X. Shi, X. Liao, K. Gao, L. Zuo, J. Chen, J. Zhao, F. Liu, Y. Chen and A. K.-Y. Jen, *Adv. Funct. Mater.*, 2018, **28**, 1802324.
- [S22] Y. Wang, Y. Zhang, N. Qiu, H. Feng, H. Guo, B. Kan, Y. Ma, C. Li, X. Wan and Y. Chen, *Adv. Energy Mater.*, 2018, **8**, 1702870.
- [S23] Z. Yao, X. Liao, K. Gao, F. Lin, X. Xu, X. Shi, L. Zuo, F. Liu, Y. Chen and A. K.-Y. Jen, *J. Am. Chem. Soc.*, 2018, **140**, 2054-2057.
- [S24] X. Ke, B. Kan, X. Wan, Y. Wang, Y. Zhang, C. Li and Y. Chen, *Dyes and Pigments*. 2018, **155**, 241-248.
- [S25] S. Dai, Y. Xiao, P. Xue, J. J. Rech, K. Liu, Z. Li, X. Lu, W. You and X. Zhan, *Chem. Mater.*, 2018, **30**, 5390-5396.
- [S26] M. Chang, Y. Wang, Y.-Q.-Q. Yi, X. Ke, X. Wan, C. Li and Y. Chen, *J. Mater. Chem. A.*, 2018, **6**, 8586-8594.
- [S27] T. Zhang, G. Zeng, F. Ye, X. Zhao and X. Yang, *Adv. Energy Mater.*, 2018, **8**, 1801387.
- [S28] S. Xu, Z. Zhou, W. Liu, Z. Zhang, F. Liu, H. Yan and X. Zhu, *Adv. Mater.*, 2017, **29**, 1704510.
- [S29] S. Li, L. Ye, W. Zhao, S. Zhang, H. Ade and J. Hou, *Adv. Energy Mater.*, 2017, **7**, 1700183.
- [S30] W. Wang, C. Yan, T.-K. Lau, J. Wang, K. Liu, Y. Fan, X. Lu and X. Zhan, *Adv. Mater.*, 2017, **29**, 1701308.
- [S31] T. Li, S. Dai, Z. Ke, L. Yang, J. Wang, C. Yan, W. Ma and X. Zhan, *Adv. Mater.*, 2018, **30**, 1705969.
- [S32] M. Li, Y. Liu, W. Ni, F. Liu, H. Feng, Y. Zhang, T. Liu, H. Zhang, X. Wan, B. Kan, Q. Zhang, T. P. Russell and Y. Chen, *J. Mater. Chem. A.*, 2016, **4**, 10409-10413.
- [S33] T. Li, H. Zhang, Z. Xiao, J. J. Rech, H. Niu, W. You and L. Ding, *Mater. Chem. Front.* 2018, **2**, 700-703.
- [S34] B. Kan, Y.-Q.-Q. Yi, X. Wan, H. Feng, X. Ke, Y. Wang, C. Li and Y. Chen, *Adv. Energy Mater.*, 2018, **8**, 1800424.
- [S35] Y. Liu, H. Zhang, Y. Sun, X. Wan and Y. Chen, *Sci China Mater.*, 2017, **60**, 49-56.
- [S36] Y.-Q.-Q. Yi, H. Feng, M. Chang, H. Zhang, X. Wan, C. Li and Y. Chen, *J. Mater. Chem. A*, 2017, **5**, 17204-17210.
- [S37] N. Qiu, H. Zhang, X. Wan, C. Li, X. Ke, H. Feng, B. Kan, H. Zhang, Q. Zhang, Y. Lu and Y. Chen, *Adv. Mater.*, 2017, **29**, 1604964.
- [S38] Y. Zhang, B. Kan, Y. Sun, Y. Wang, R. Xia, X. Ke, Y.-Q.-Q. Yi, C. Li, H.-L. Yip, X. Wan, Y. Cao and Y. Chen, *Adv. Mater.*, 2018, **30**, 1707508.
- [S39] Y. Lin, F. Zhao, S. K. K. Prasad, J.-X. Chen, W. Cai, Q. Zhang, K. Chen, Y. Wu, W. Ma, F. Gao, J.-X. Tang, C. Wang, W. You, J. M. Hodgkiss and X. Zhan, *Adv. Mater.*, 2018, **30**, 1706363.
- [S40] J. Zhu, Y. Wu, J. Rech, J. Wang, K. Liu, T. Li, Y. Li, W. Ma, W. You and X. Zhan, *J. Mater. Chem. C*, 2018, **6**, 66-71.

- [S41] Z. Li, S. Dai, J. Xin, L. Zhang, Y. Wu, J. Rech, F. Zhao, T. Li, K. Liu, Q. Liu, W. Ma, W. You, C. Wang and X. Zhan, *Mater. Chem. Front.*, 2018, **2**, 537-543.
- [S42] B. Jia, S. Dai, Z. Ke, C. Yan, W. Ma and X. Zhan, *Chem. Mater.*, 2018, **30**, 239-245.
- [S43] H. Zhang, Y. Liu, Y. Sun, M. Li, W. Ni, Q. Zhang, X. Wan and Y. Chen, *Chin. J. Chem.* 2015, **33**, 852-858.
- [S44] H. Zhang, H. Yao, J. Hou, J. Zhu, J. Zhang, W. Li, R. Yu, B. Gao, S. Zhang and J. Hou, *Adv. Mater.*, 2018, **30**, 1800613.
- [S45] J. Zhu, Z. Ke, Q. Zhang, J. Wang, S. Dai, Y. Wu, Y. Xu, Y. Lin, W. Ma, W. You and X. Zhan, *Adv. Mater.*, 2018, **30**, 1704713.
- [S46] S. Dai, T. Li, W. Wang, Y. Xiao, T.-K. Lau, Z. Li, K. Liu, X. Lu and X. Zhan, *Adv. Mater.* 2018, **30**, 1706571.
- [S47] Y. Yang, J. Wang, H. Xu, X. Zhan and X. Chen, *ACS Appl. Mater. Interfaces.*, 2018, **10**, 18984-18992.
- [S48] S. Dai, F. Zhao, Q. Zhang, T.-K. Lau, K. Liu, Q. Ling, C. Wang, X. Lu, W. You and X. Zhan, *J. Am. Chem. Soc.*, 2017, **139**, 1336-1343.
- [S49] W. Zhao, S. Zhang, Y. Zhang, S. Li, X. Liu, C. He, Z. Zheng and J. Hou, *Adv. Mater.* 2018, **30**, 1704837.
- [S50] H. Feng, N. Qiu, X. Wang, Y. Wang, B. Kan, X. Wan, M. Zhang, A. Xia, C. Li, F. Liu, H. Zhang and Y. Chen, *Chem. Mater.*, 2017, **29**, 7908-7917.
- [S51] J. Zhu, Y. Xiao, J. Wang, K. Liu, H. Jiang, Y. Lin, X. Liu and X. Zhan, *Chem. Mater.* 2018, **30**, 4150-4156.
- [S52] Z. Zheng, O. M. Awartani, B. Gautam, D. Liu, Y. Qin, W. Li, A. Bataller, K. Gundogdu, H. Ade and J. Hou, *Adv. Mater.*, 2017, **29**, 1604241.
- [S53] X. Li, H. Huang, H. Bin, Z. Peng, C. Zhu, L. Xue, Z.-G. Zhang, Z. Zhang, H. Ade and Y. Li, *Chem. Mater.*, 2017, **29**, 10130-10138.
- [S54] X. Li, J. Yao, I. Angunawela, C. Sun, L. Xue, A. Liebman-Pelaez, C. Zhu, C. Yang, Z.-G. Zhang, H. Ade and Y. Li, *Adv. Energy Mater.*, 2018, **8**, 1800815.
- [S55] Y. Li, J.-D. Lin, X. Che, Y. Qu, F. Liu, L.-S. Liao and S. R. Forrest, *J. Am. Chem. Soc.* 2017, **139**, 17114-17119.
- [S56] D. Ma, S. Feng, Z. Zhang, C. Li, S. Yan and Z. Bo, *Dyes and Pigments.*, 2018, **150**, 363-369.
- [S57] Y. Liu, Z. Zhang, S. Feng, M. Li, L. Wu, R. Hou, X. Xu, X. Chen and Z. Bo, *J. Am. Chem. Soc.*, 2017, **139**, 3356-3359.
- [S58] Z. Luo, H. Bin, T. Liu, Z.-G. Zhang, Y. Yang, C. Zhong, B. Qiu, G. Li, W. Gao, D. Xie, K. Wu, Y. Sun, F. Liu, Y. Li and C. Yang, *Adv. Mater.*, 2018, **30**, 1706124.
- [S59] D. Liu, L. Yang, Y. Wu, X. Wang, Y. Zeng, G. Han, H. Yao, S. Li, S. Zhang, Y. Zhang, Y. Yi, C. He, W. Ma and J. Hou, *Chem. Mater.*, 2018, **30**, 619-628.
- [S60] W. Liu, J. Zhang, Z. Zhou, D. Zhang, Y. Zhang, S. Xu and X. Zhu, *Adv. Mater.*, 2018, **30**, 1800403.
- [S61] Z. Luo, Y. Zhao, Z.-G. Zhang, G. Li, K. Wu, D. Xie, W. Gao, Y. Li and C. Yang, *ACS Appl. Mater. Interfaces*, 2017, **9**, 34146-34152.
- [S62] S. Feng, C. E. Zhang, Y. Liu, Z. Bi, Z. Zhang, X. Xu, W. Ma and Z. Bo, *Adv. Mater.* 2017, **29**, 1703527.
- [S63] S. Li, L. Zhan, W. Zhao, S. Zhang, B. Ali, Z. Fu, T.-K. Lau, X. Lu, M. Shi, C.-Z. Li, J. Hou and H. Chen, *J. Mater. Chem. A*, 2018, **6**, 12132-12141.
- [S64] S. Li, W. Zhao, S. Zhang, S. Mukherjee, H. Ade and J. Hou, *Adv. Mater.*, 2016, **28**, 9423-9429.
- [S65] Y. Cui, C. Yang, H. Yao, J. Zhu, Y. Wang, G. Jia, F. Gao and J. Hou, *Adv. Mater.*, 2017, **29**, 1703080.
- [S66] B. Kan, J. Zhang, F. Liu, X. Wan, C. Li, X. Ke, Y. Wang, H. Feng, Y. Zhang, G. Long, R. H. Friend, A. A. Bakulin and Y. Chen, *Adv. Mater.*, 2018, **30**, 1704904.



- [S67] H.-H. Gao, Y. Sun, X. Wan, B. Kan, X. Ke, H. Zhang, C. Li and Y. Chen, *Sci China Mater.*, 2017, **60**, 819-828.
- [S68] Y. Lin, J. Wang, Z. G. Zhang, H. Bai, Y. Li, D. Zhu and X. Zhan, *Adv. Mater.*, 2015, **27**, 1170.
- [S69] Y. Li, X. Liu, F.-P. Wu, Y. Zhou, Z.-Q. Jiang, B. Song, Y. Xia, Z.-G. Zhang, F. Gao, O. Inganäs, Y. Li and L.-S. Liao, *J. Mater. Chem. A.*, 2016, **4**, 5890-5897.
- [S70] H. Yao, Y. Chen, Y. Qin, R. Yu, Y. Cui, B. Yang, S. Li, K. Zhang and J. Hou, *Adv. Mater.*, 2016, **28**, 8283-8287.
- [S71] W. Zhao, S. Li, H. Yao, S. Zhang, Y. Zhang, B. Yang and J. Hou, *J. Am. Chem. Soc.*, 2017, **139**, 7148-7151.
- [S72] H. Zhang, S. Li, B. Xu, H. Yao, B. Yang and J. Hou, *J. Mater. Chem. A*, 2016, **4**, 18043-18049.
- [S73] J. Sun, X. Ma, Z. Zhang, J. Yu, J. Zhou, X. Yin, L. Yang, R. Geng, R. Zhu, F. Zhang and W. Tang, *Adv. Mater.*, 2018, **30**, 1707150.
- [S74] T. J. Aldrich, S. M. Swick, F. S. Melkonyan and T. J. Marks, *Chem. Mater.*, 2017, **29**, 10294-10298.
- [S75] F. Zhao, S. Dai, Y. Wu, Q. Zhang, J. Wang, L. Jiang, Q. Ling, Z. Wei, W. Ma, W. You, C. Wang and X. Zhan, *Adv. Mater.*, 2017, **29**, 1700144.
- [S76] Y. Lin, Q. He, F. Huo, J. Mai, X. Lu, C.-J. Su, T. Li, J. Wang, J. Zhu, Y. Sun, C. Wang and X. Zhan, *J. Am. Chem. Soc.*, 2016, **138**, 2973-2976.
- [S77] Y. Yang, Z.-G. Zhang, H. Bin, S. Chen, L. Gao, L. Xue, C. Yang and Y. Li, *J. Am. Chem. Soc.*, 2016, **138**, 15011-15018.
- [S78] Y. Lin, F. Zhao, Q. He, L. Huo, Y. Wu, T. C. Parker, W. Ma, Y. Sun, C. Wang, D. Zhu, A. J. Heeger, S. R. Marder and X. Zhan, *J. Am. Chem. Soc.*, 2016, **138**, 4955-4961.
- [S79] H. Yao, Y. Cui, R. Yu, B. Gao, H. Zhang and J. Hou, *Angew. Chem. Int. Ed.*, 2017, **56**, 3045-3049.
- [S80] Y. Wang, Q. Fan, X. Guo, W. Li, B. Guo, W. Su, X. Ou and M. Zhang, *J. Mater. Chem. A*, 2017, **5**, 22180-22185.
- [S81] S. Li, L. Ye, W. Zhao, X. Liu, J. Zhu, H. Ade and J. Hou, *Adv. Mater.*, 2017, **29**, 1704051.
- [S82] X. Shi, J. Chen, K. Gao, L. Zuo, Z. Yao, F. Liu, J. Tang and A. K.-Y. Jen, *Adv. Energy Mater.*, 2018, **8**, 1702831.
- [S83] Y. Lin, Z.-G. Zhang, H. Bai, J. Wang, Y. Yao, Y. Li, D. Zhu and X. Zhan, *Energy Environ. Sci.* 2015, **8**, 610-616.
- [S84] X. Shi, L. Zuo, S. B. Jo, K. Gao, F. Lin, F. Liu and A. K.-Y. Jen, *Chem. Mater.*, 2017, **29**, 8369.
- [S85] Q. Fan, W. Su, Y. Wang, B. Guo, Y. Jiang, X. Guo, F. Liu, T. P. Russell, M. Zhang and Y. Li, *Sci. China. Chem.*, 2018, **61**, 531-537.
- [S86] Z. Zhang, W. Liu, T. Rehman, H.-X. Ju, J. Mai, X. Lu, M. Shi, J. Zhu, C.-Z. Li and H. Chen, *J. Mater. Chem. A*, 2017, **5**, 9649-9654.
- [S87] J. Wang, W. Wang, X. Wang, Y. Wu, Q. Zhang, C. Yan, W. Ma, W. You and X. Zhan, *Adv. Mater.*, 2017, **29**, 1702125.
- [S88] H. Bai, Y. Wang, P. Cheng, J. Wang, Y. Wu, J. Hou and X. Zhan, *J. Mater. Chem. A*, 2015, **3**, 1910-1914.
- [S89] W. Gao, Q. An, R. Ming, D. Xie, K. Wu, Z. Luo, Y. Zou, F. Zhang and C. Yang, *Adv. Funct. Mater.*, 2017, **27**, 1702194.
- [S90] Q. An, W. Gao, F. Zhang, J. Wang, M. Zhang, K. Wu, X. Ma, Z. Hu, C. Jiao and C. Yang, *J. Mater. Chem. A.*, 2018, **6**, 2468-2475.
- [S91] Q. Fan, Y. Wang, M. Zhang, B. Xu, X. Guo, Y. Jiang, W. Li, B. Guo, C. Ye, W. Su, J. Fang, X. Ou, F. Liu, Z. Wei, T. C. Sum, T. P. Russell and Y. Li, *Adv. Mater.*, 2017, **29**, 1704546.
- [S92] J. Wang, J. Zhang, Y. Xiao, T. Xiao, R. Zhu, C. Y, Y. Fu, G. Lu, X. Lu, S. R. Marder and X. Zhan, *J. Am. Chem. Soc.*, 2018, **140**, 9140-9147.

- [S93] B. Kan, H. Feng, H. Yao, M. Chang, X. Wan, C. Li, J. Hou and Y. Chen, *Sci China Chem.*, 2018, **61**,1307-1313.
- [S94] J. Qu, H. Chen, J. Zhou, H. Lai, T. Liu, P. Chao, D. Li, Z. Xie, F. He and Y. Ma, *ACS Appl. Mater. Interfaces*, 2018, **10**, 39992-40000.
- [S95] J.-L. Wang, K.-K. Liu, L. Hong, G.-Y. Ge, C. Zhang and J. Hou, *ACS Energy Lett*, 2018, **3**, 2967-2976.
- [S96] H. Feng, Y.-Q.-Q. Yi, X. Xin, J. Yan, Y. Zhang, X. Wan, C. Li, N. Zheng, Z. Xie and Y. Chen, *Adv. Energy Mater*, 2019, **9**, 1803541.
- [S97] D. He, F. Zhao, J. Xin, J. J. Rech, Z. Wei, W. Ma, W. You, B. Li, L. Jiang and C. Wang, *Adv. Energy Mater.*, 2018, **8**, 1802050.
- [S98] Y. Li, N. Zhang, L. Yu, S. Wen, C. Gao, M. Sun and R. Yang, *Adv. Mater.* 2019, **31**, 1807832.
- [S99] W. Li, M. Chen, J. Cai, E. L. K. Spooner, H. Zhang, R. S. Gurney, D. Liu, Z. Xiao, D. G. Lidzey, L. Ding and T. Wang, *Joule*, 2019, **3**, 819-833.

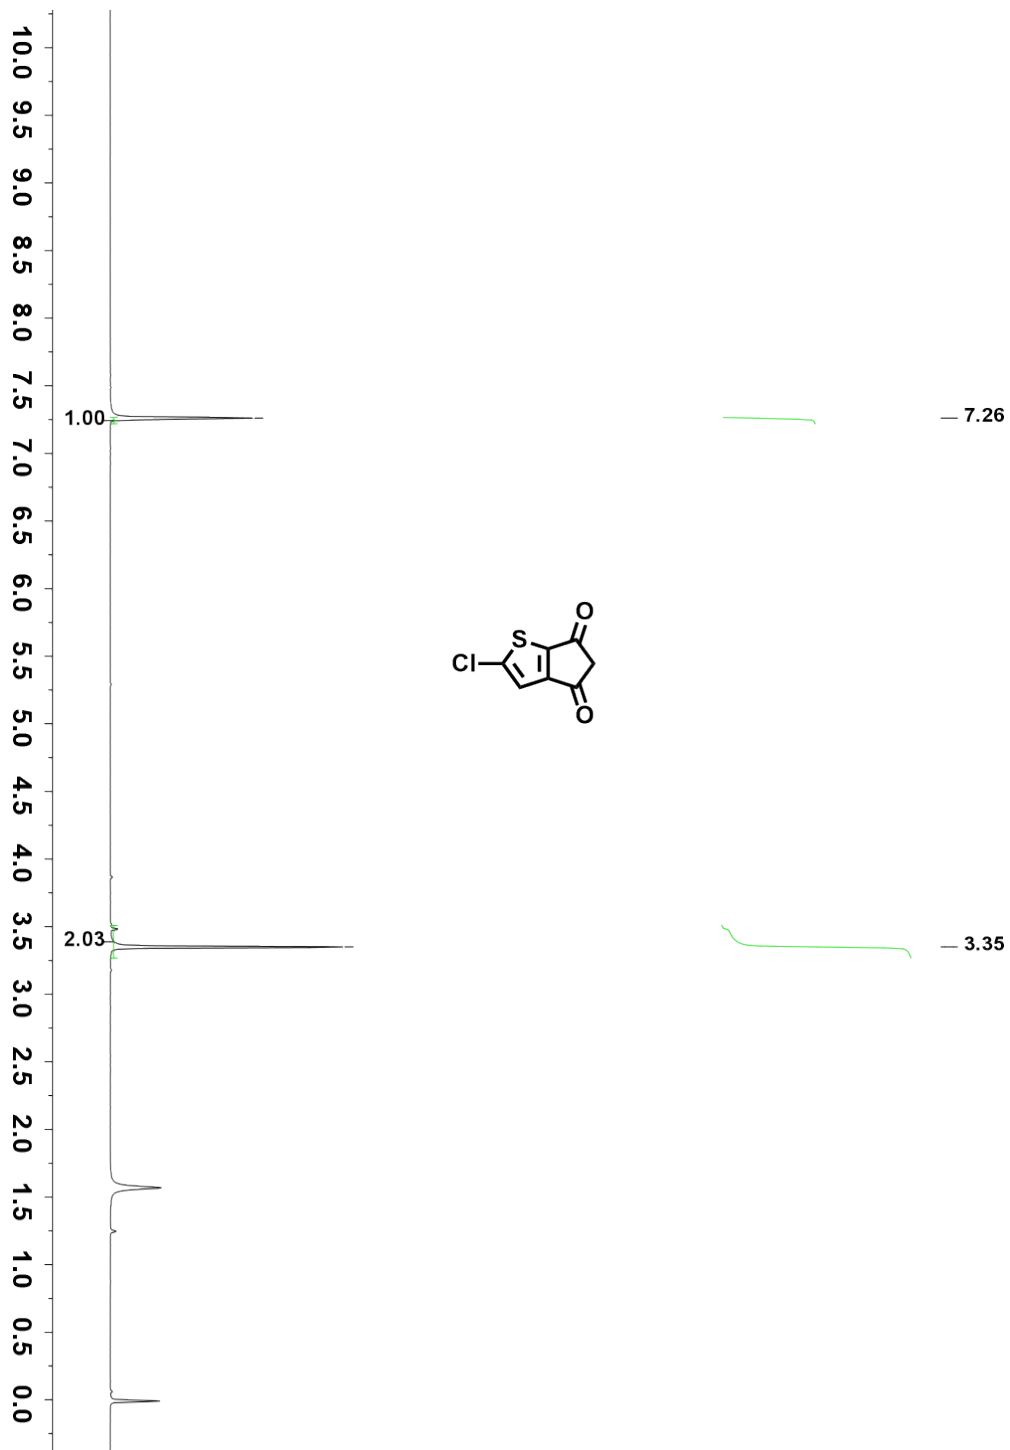

<sup>1</sup>H NMR spectrum for **compound 3**

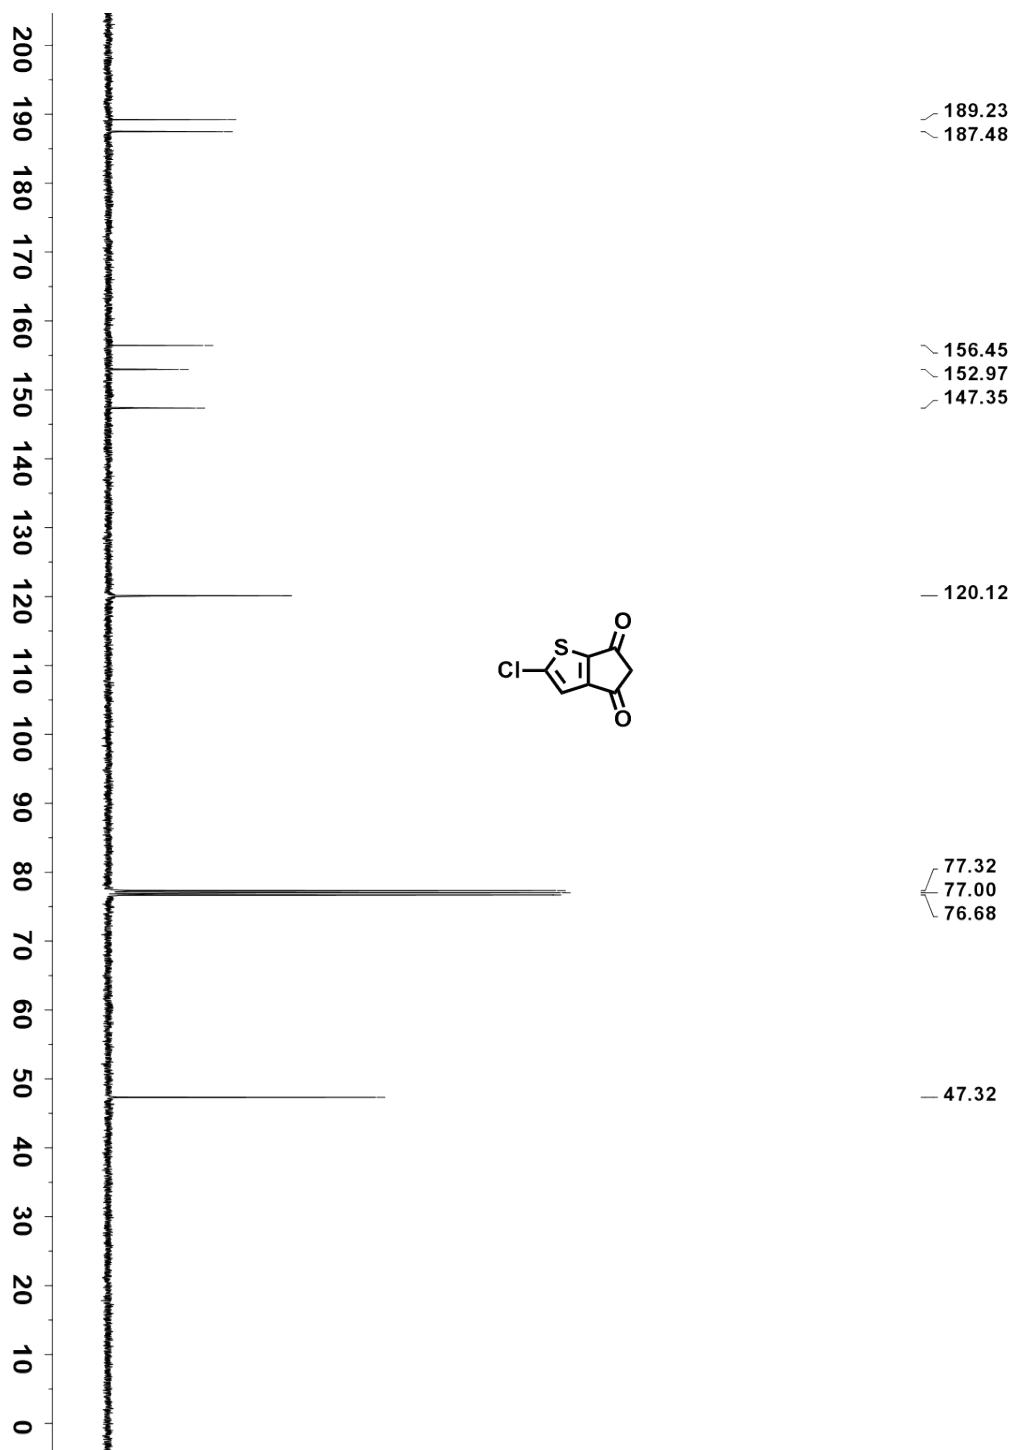

<sup>13</sup>C NMR spectrum for **compound 3**

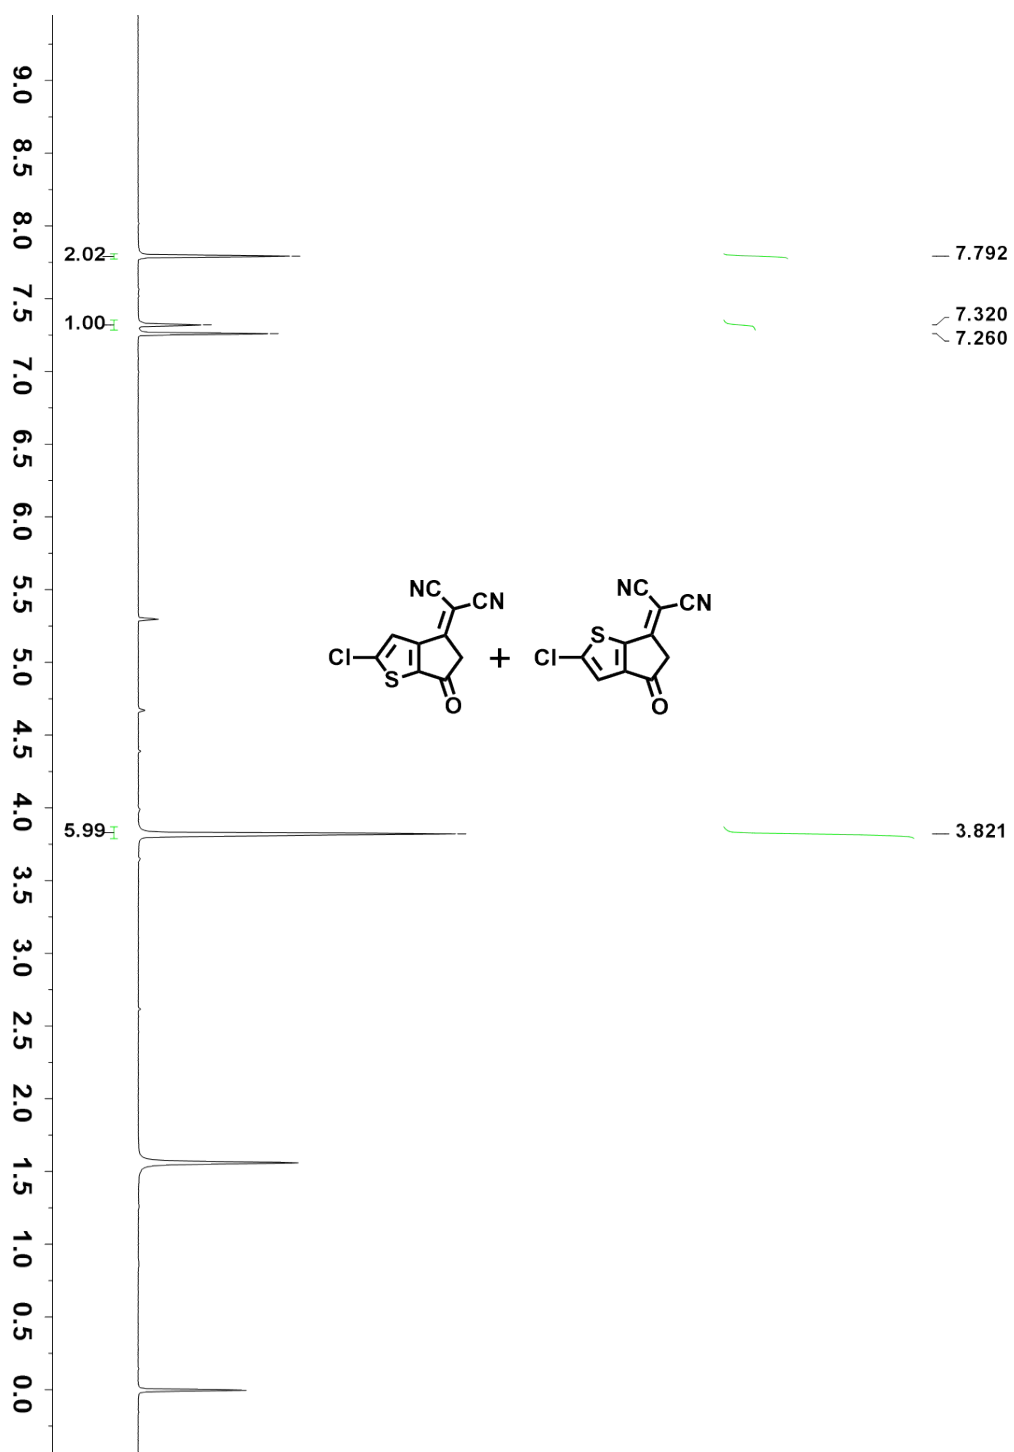

$^1\text{H}$  NMR spectrum for **ThCl**

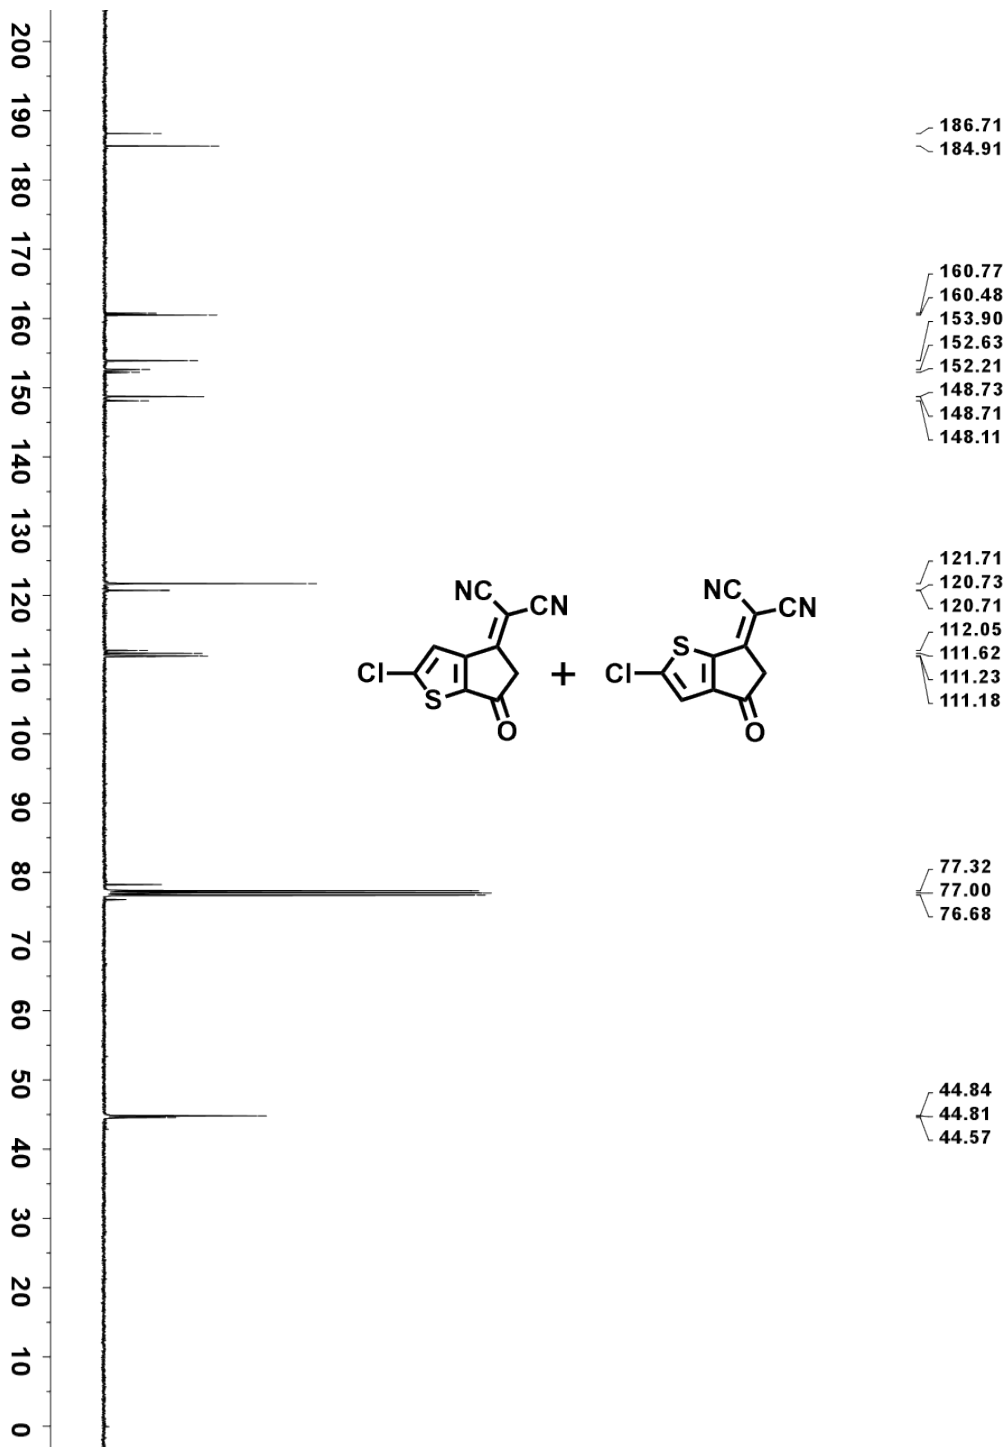

<sup>13</sup>C NMR spectrum for ThCl



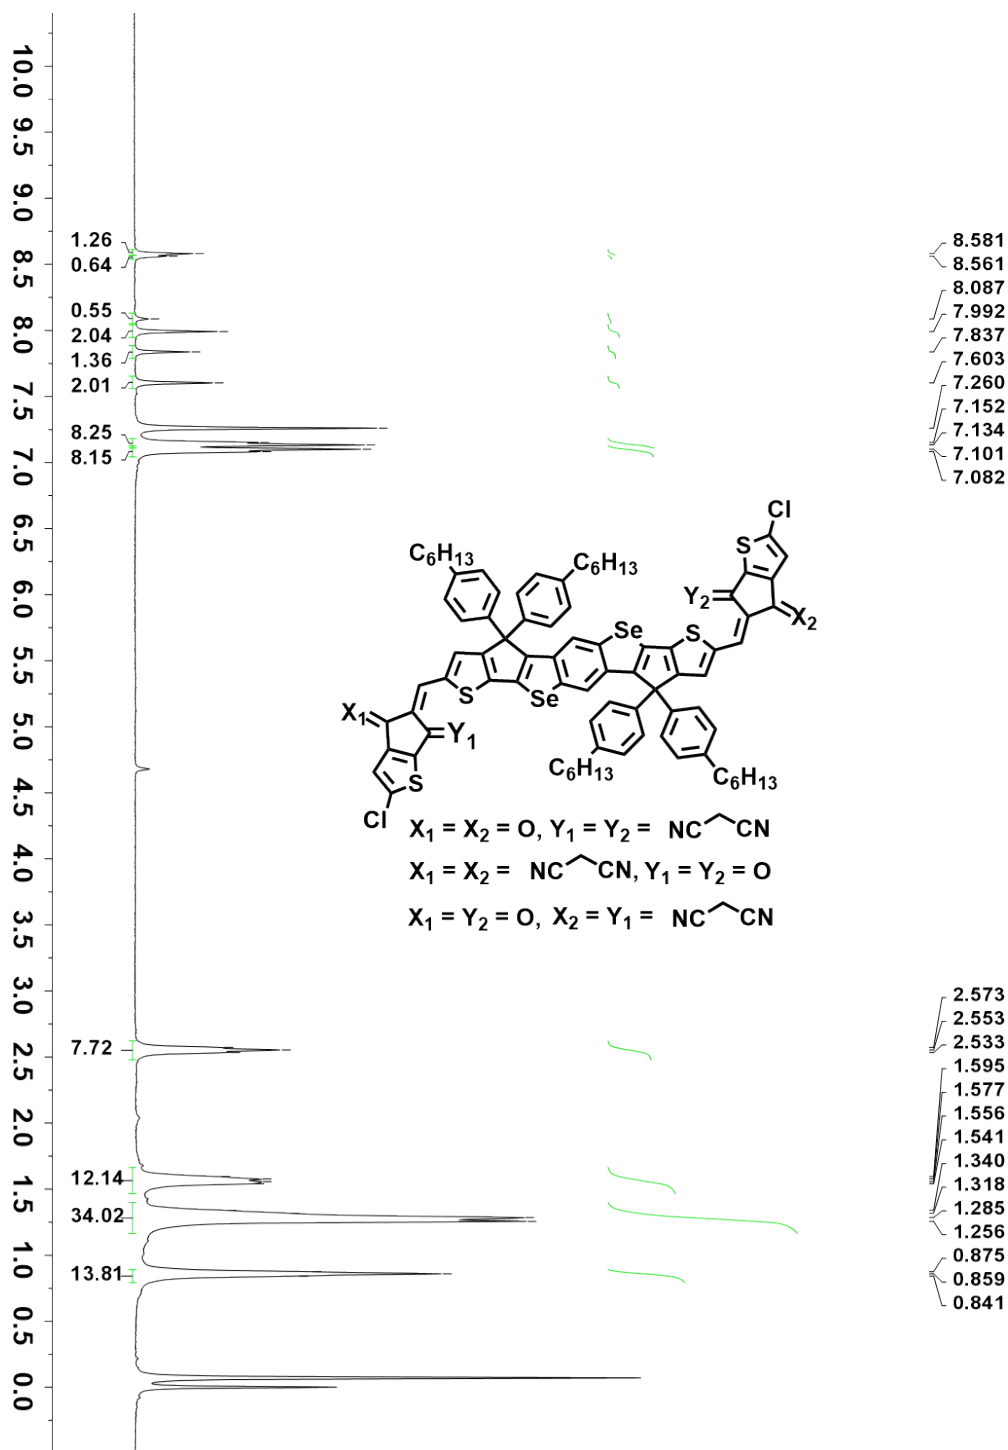

<sup>1</sup>H NMR spectrum for **BDSeThCl**

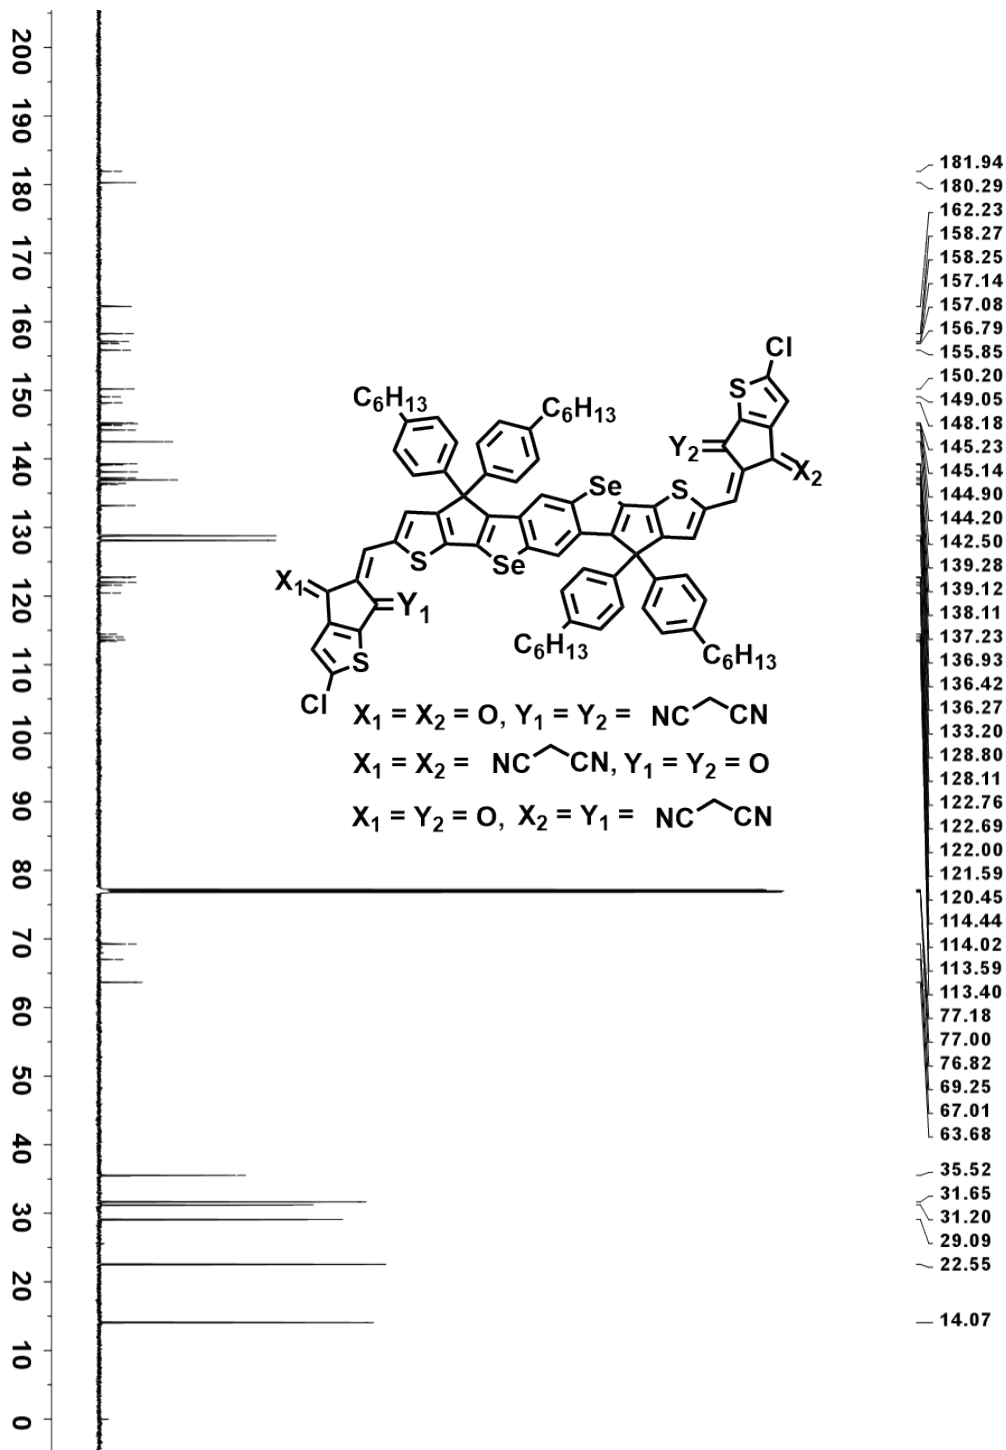

<sup>13</sup>C NMR spectrum for **BDBSeThCl**

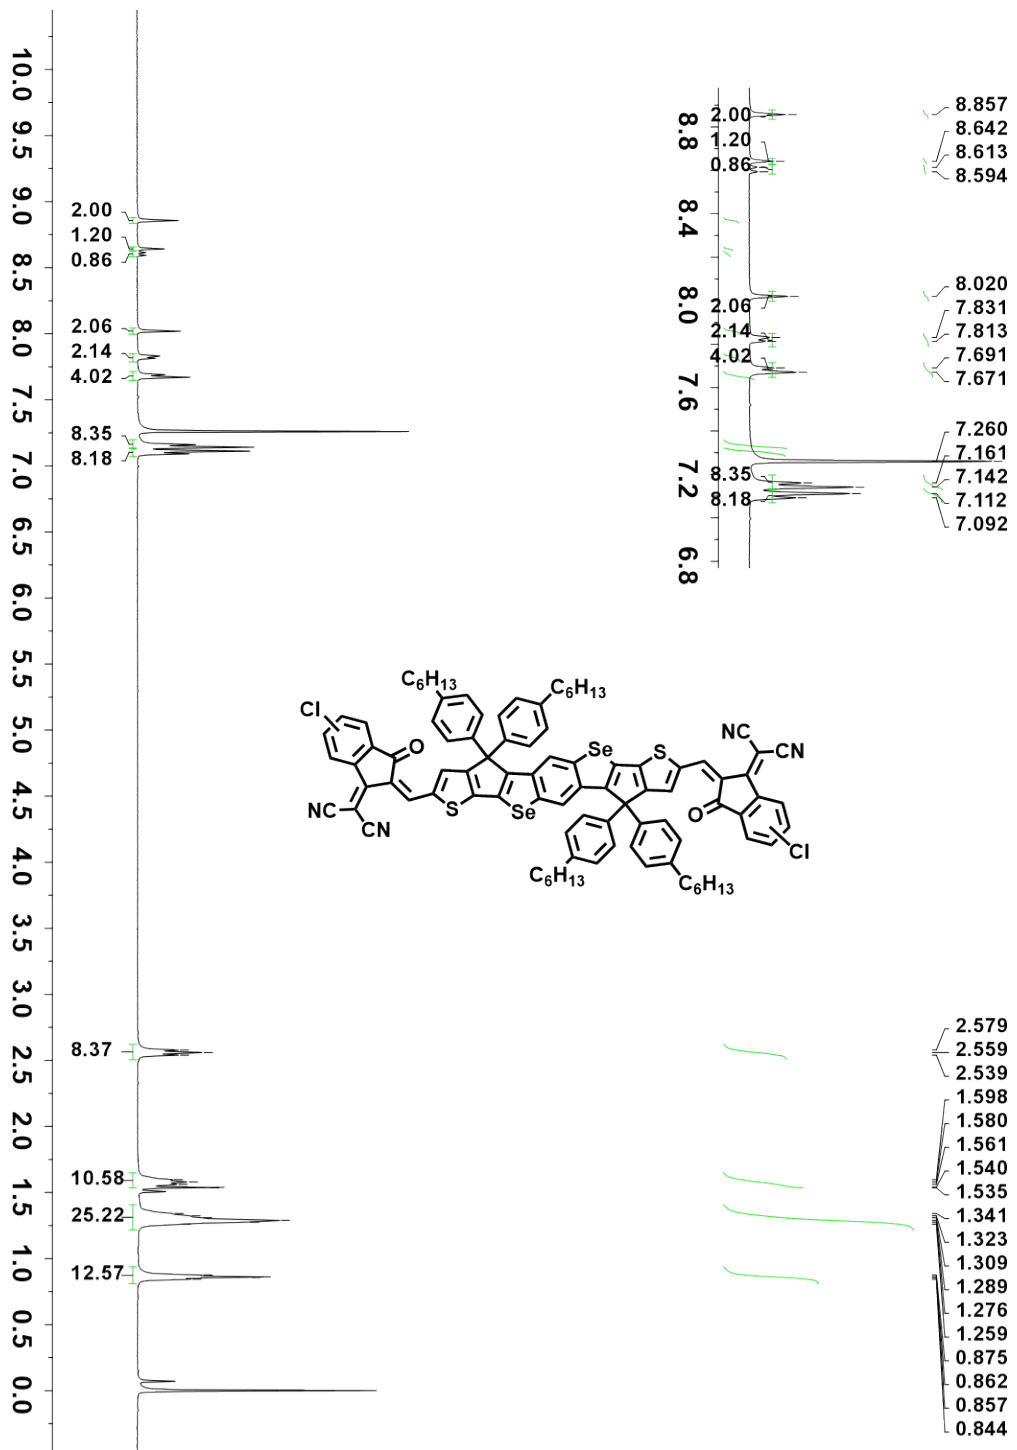

<sup>1</sup>H NMR spectrum for **BDS<sub>e</sub>PhCl**

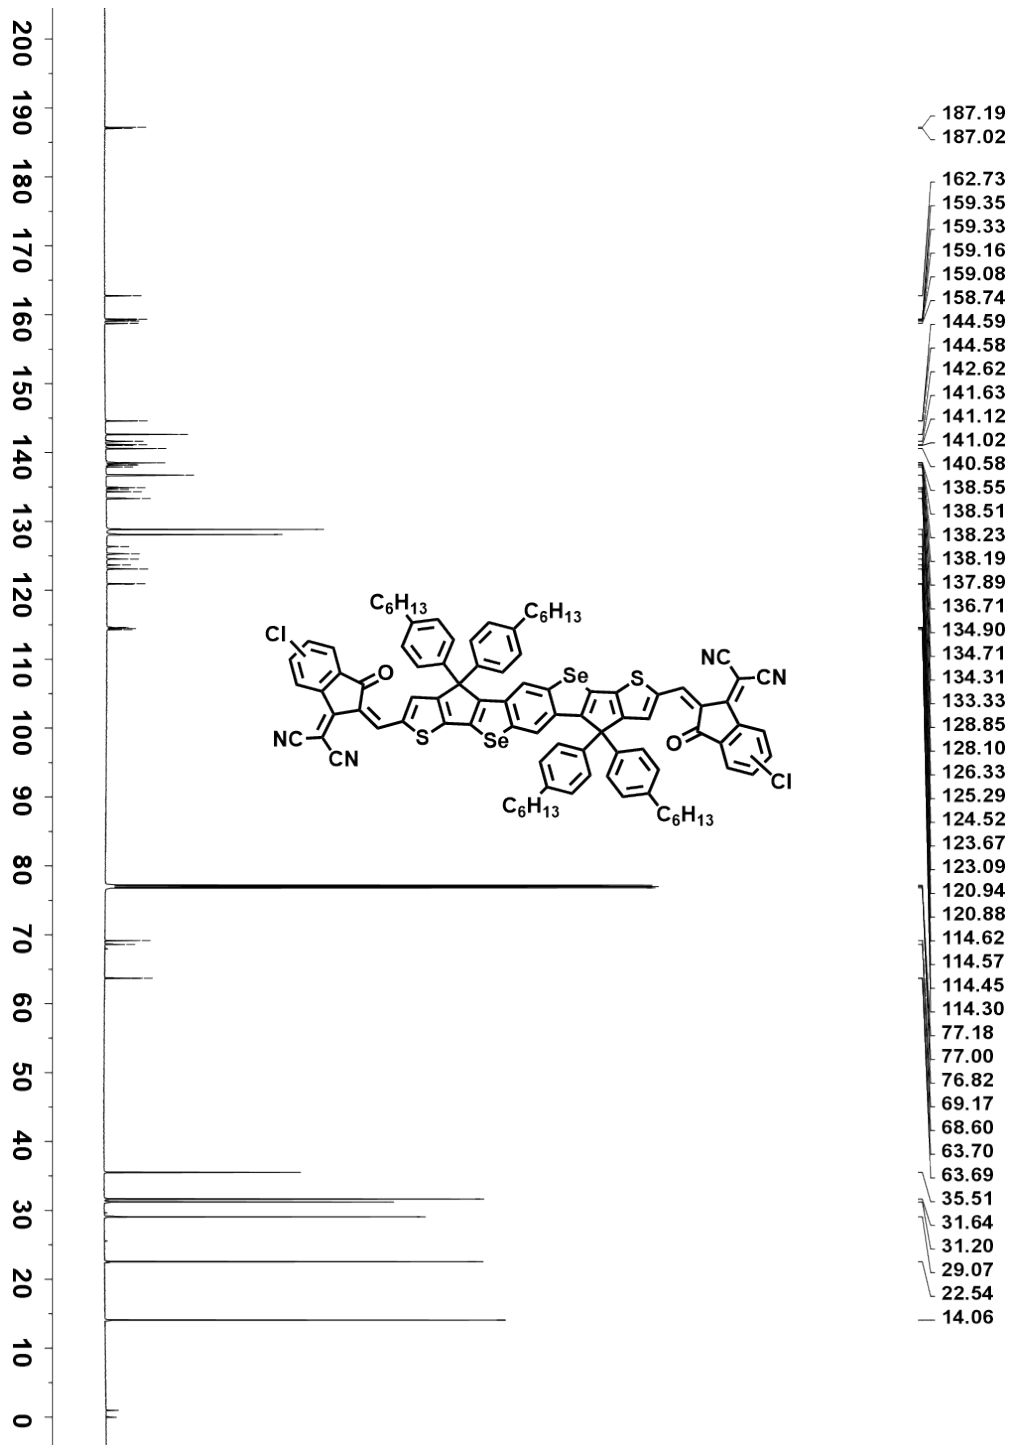

$^{13}\text{C}$  NMR spectrum for **BSePhCl**

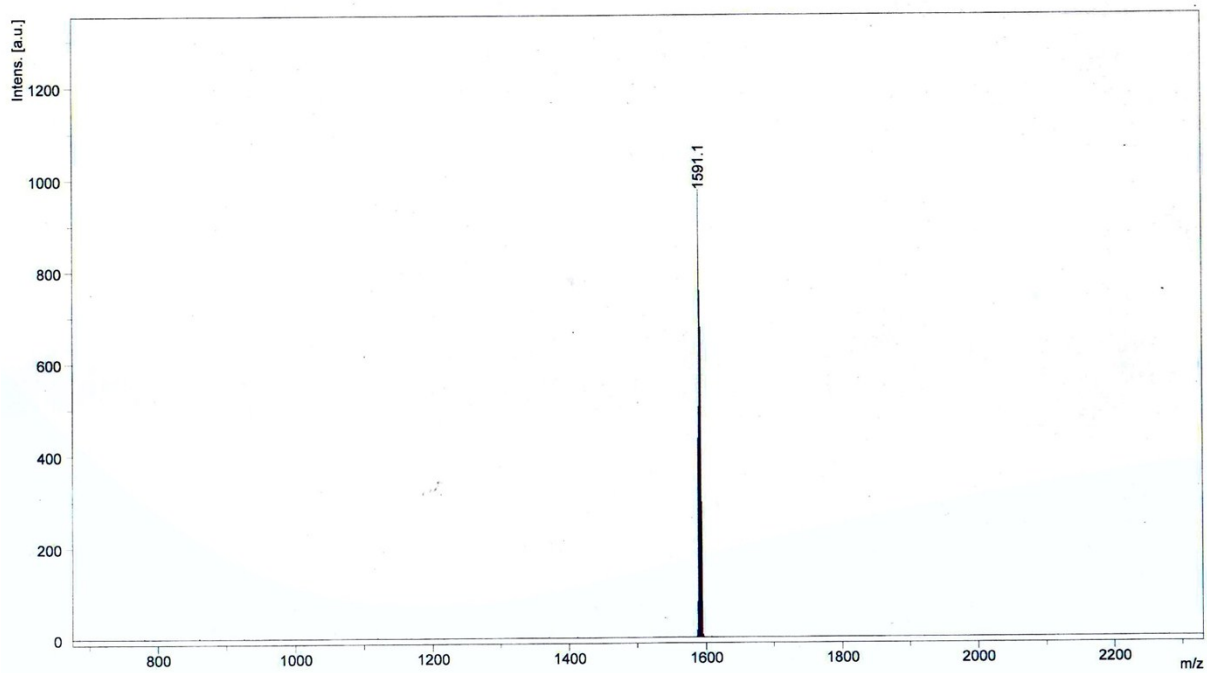

MALDI-TOF mass spectrum of **BDSePhCl**

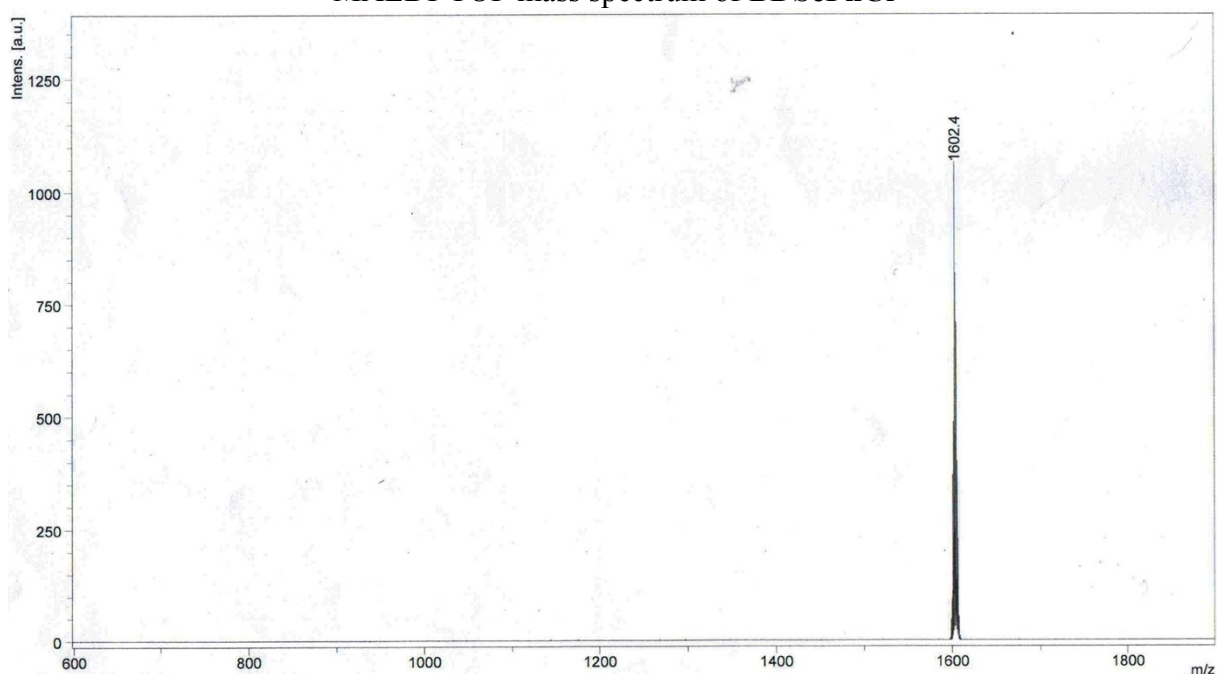

MALDI-TOF mass spectrum of **BDSeThCl**
